# Supplementary material for: On chirality induction in poly(phenylenedisilanylene)s
Source: Royal Society of Chemistry journal article supplement (doi:10.1039/c2py20378b), 2012-01-01
Supplement: c2py20378b.pdf [file c2py20378b.pdf]

*Electronic Supplementary Information for*

**On chirality induction in poly(phenylenedisilanylene)s**

Takanobu Sanji, Yuta Sato, Nobu Kato and Masato Tanaka

### Synthesis of model-m,

#### (1-(2*S*)-[2-(2-(2-methoxyethoxy)ethoxy)propan-2-oxy-3,5-bis(pentamethyldisilanyl)benzene)

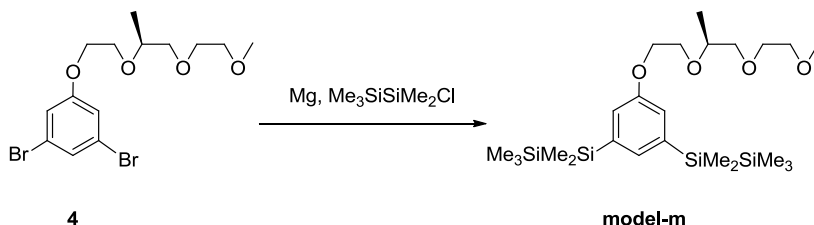

To Mg (0.41 g, 17 mmol) in THF (10 mL), a mixture of **4** (0.96 g, 2.3 mmol) and chloropentamethyldisilane (2.55 g, 15.3 mol) in THF (1 mL) was dropwised. After stirring at room temperature, the mixture was refluxed overnight. After the reaction, ethanol and H<sub>2</sub>O were added to the mixture. The organic layer was extracted with dichloromethane (20 mL × 4) washed with sat. NH<sub>4</sub>Cl aq., sat. NaCl aq. and dried with MgSO<sub>4</sub>. After filtration and removal of the solvent, **model-m** was obtained after purification with silica gel chromatography, the preparative HPCL, and the preparative TLC as a colorless oil (38.0 mg, 0.074 mmol, 3% yield).

**Model-m:** <sup>1</sup>H NMR (300 MHz, C<sub>6</sub>D<sub>6</sub>): δ = 0.13 (s, 18H, Me<sub>3</sub>Si), 0.38 (s, 12H, Me<sub>2</sub>Si), 1.17 (d, 3H, CHCH<sub>3</sub>, *J* = 6.4 Hz), 3.12 (s, 3H, OCH<sub>3</sub>), 3.34 (t, 2H, *J* = 4.5 Hz), 3.45–3.60 (m, 6H), 3.73–3.87 (m, 2H), 4.04–4.09 (m, 1H), 7.25 (s, 2H, ArH), 7.42 (s, 1H, ArH); <sup>13</sup>C NMR (75 MHz, C<sub>6</sub>D<sub>6</sub>): δ = −3.78 (Me<sub>3</sub>Si), −2.05 (Me<sub>2</sub>Si), 17.6 (CHCH<sub>3</sub>), 58.7 (OCH<sub>3</sub>), 69.3, 71.0, 71.3, 71.7, 72.4, 74.8 (CH<sub>2</sub>, CHCH<sub>3</sub>), 120.2, 132.4, 140.6, 158.8 (Ar); <sup>29</sup>Si NMR (60 MHz, C<sub>6</sub>D<sub>6</sub>): δ = −21.2 (SiMe<sub>3</sub>), −19.3 (SiMe<sub>2</sub>); Anal. Calcd for C<sub>24</sub>H<sub>50</sub>O<sub>4</sub>Si<sub>4</sub>: C, 55.97; H, 9.79; Found: C, 55.98; H, 9.81.

Table S1 Photophysical properties of **m-1a** and **model-m** in methanol

|                | ABS                  |                                    | CD                   |                                     |                                                 | FL                  |
|----------------|----------------------|------------------------------------|----------------------|-------------------------------------|-------------------------------------------------|---------------------|
|                | λ <sub>max</sub> /nm | ε/cm <sup>−1</sup> M <sup>−1</sup> | λ <sub>ext</sub> /nm | Δε/cm <sup>−1</sup> M <sup>−1</sup> | g <sub>abs</sub> × 10 <sup>5</sup> <sup>a</sup> | λ <sub>FL</sub> /nm |
| <b>m-1a</b>    | 289                  | 3800                               | 291                  | +0.14                               | 3.9                                             | 314 <sup>b</sup>    |
|                | 296                  | 3700                               | 295                  | +0.17                               | 4.5                                             |                     |
| <b>model-m</b> | 287                  | 3400                               | 287                  | +0.0044                             | 1.3                                             | 311 <sup>c</sup>    |
|                | 294                  | 3200                               | 295                  | +0.040                              | 1.2                                             |                     |

<sup>a</sup> g<sub>abs</sub> = Δε/ε. <sup>b</sup> Excited at 288 nm. <sup>c</sup> Excited at 287 nm.

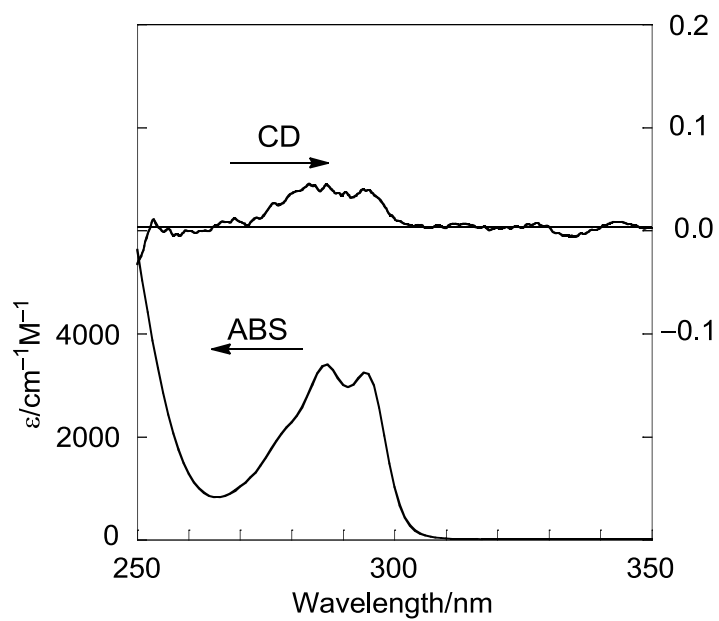

**Fig. S1** Absorption and CD spectra of **m-model** in methanol ( $c = 3.82 \times 10^{-4}$  M).



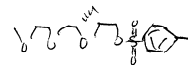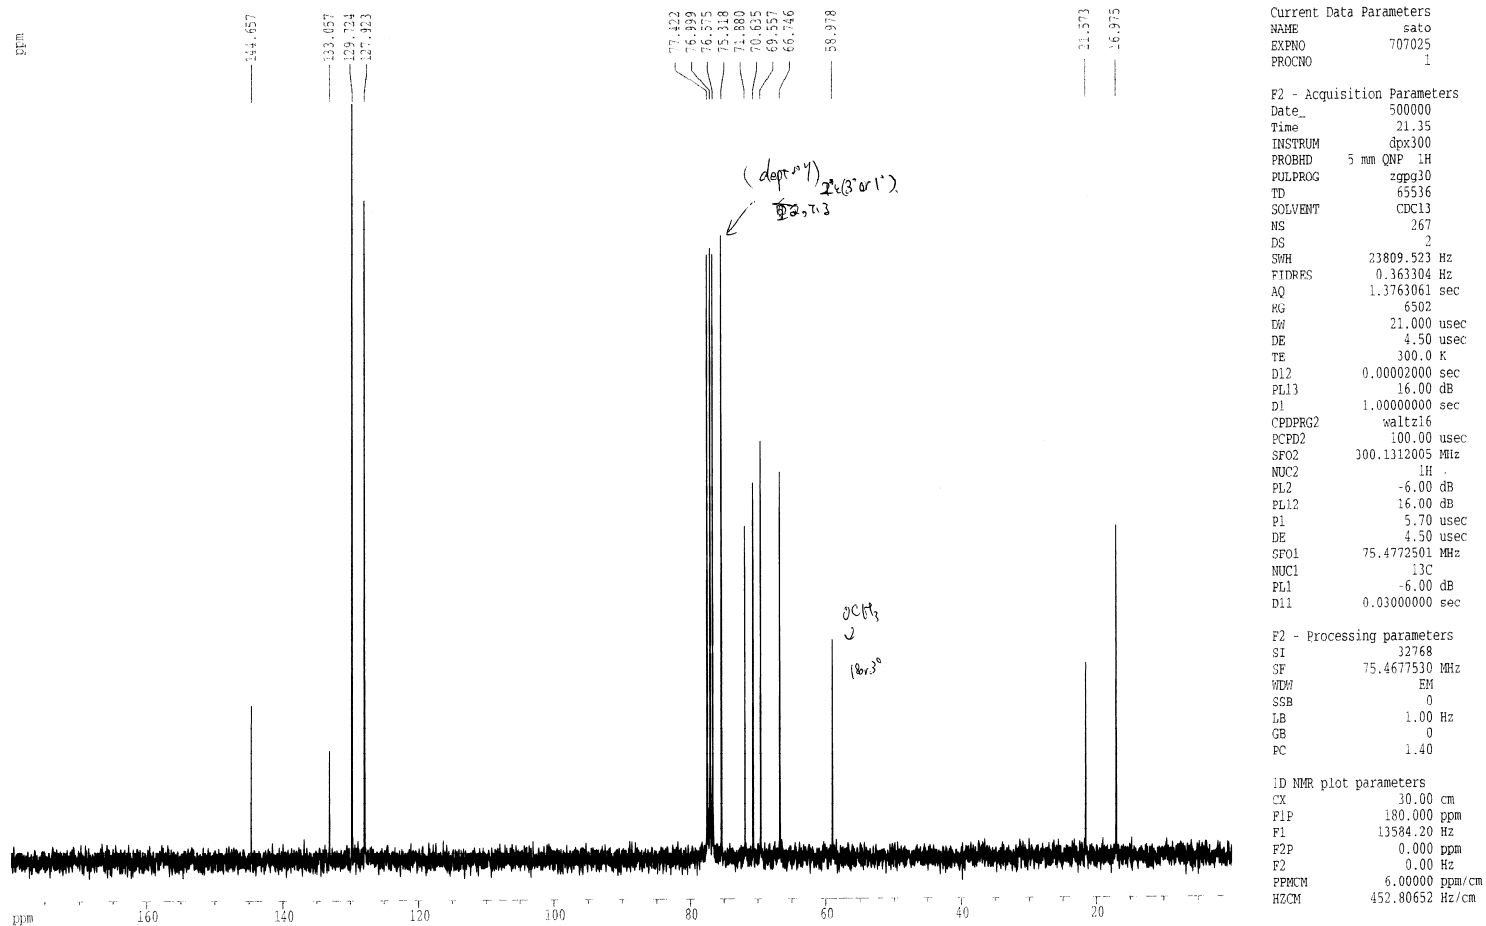

Figure 2S. <sup>13</sup>C NMR spectra of **5** in CDCl<sub>3</sub>.

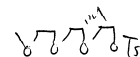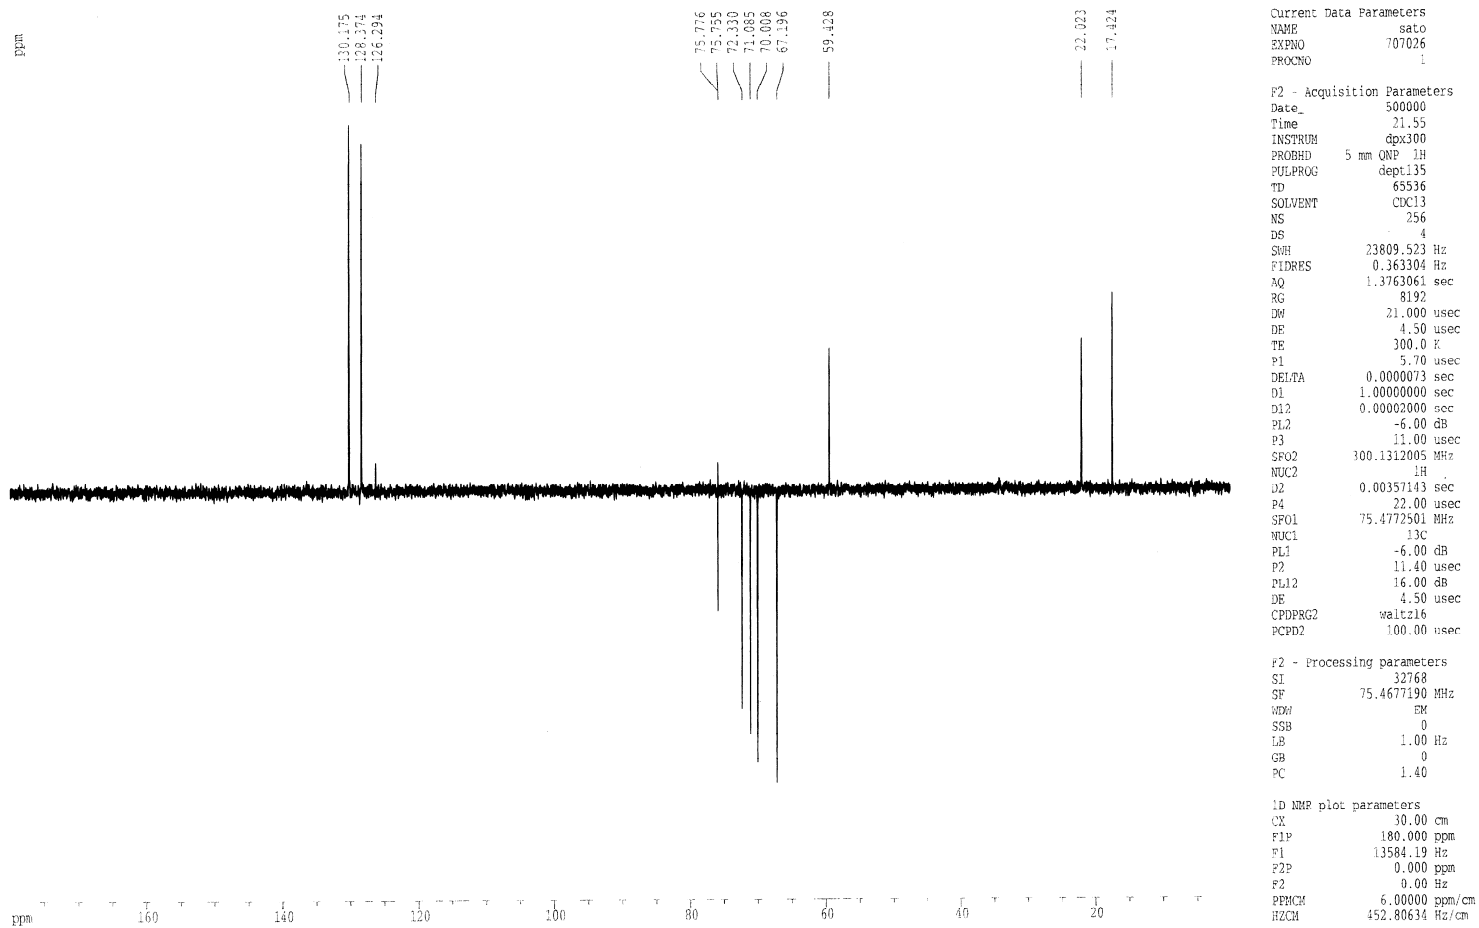

Figure 3S. <sup>13</sup>C NMR dept spectra of **5** in CDCl<sub>3</sub>.

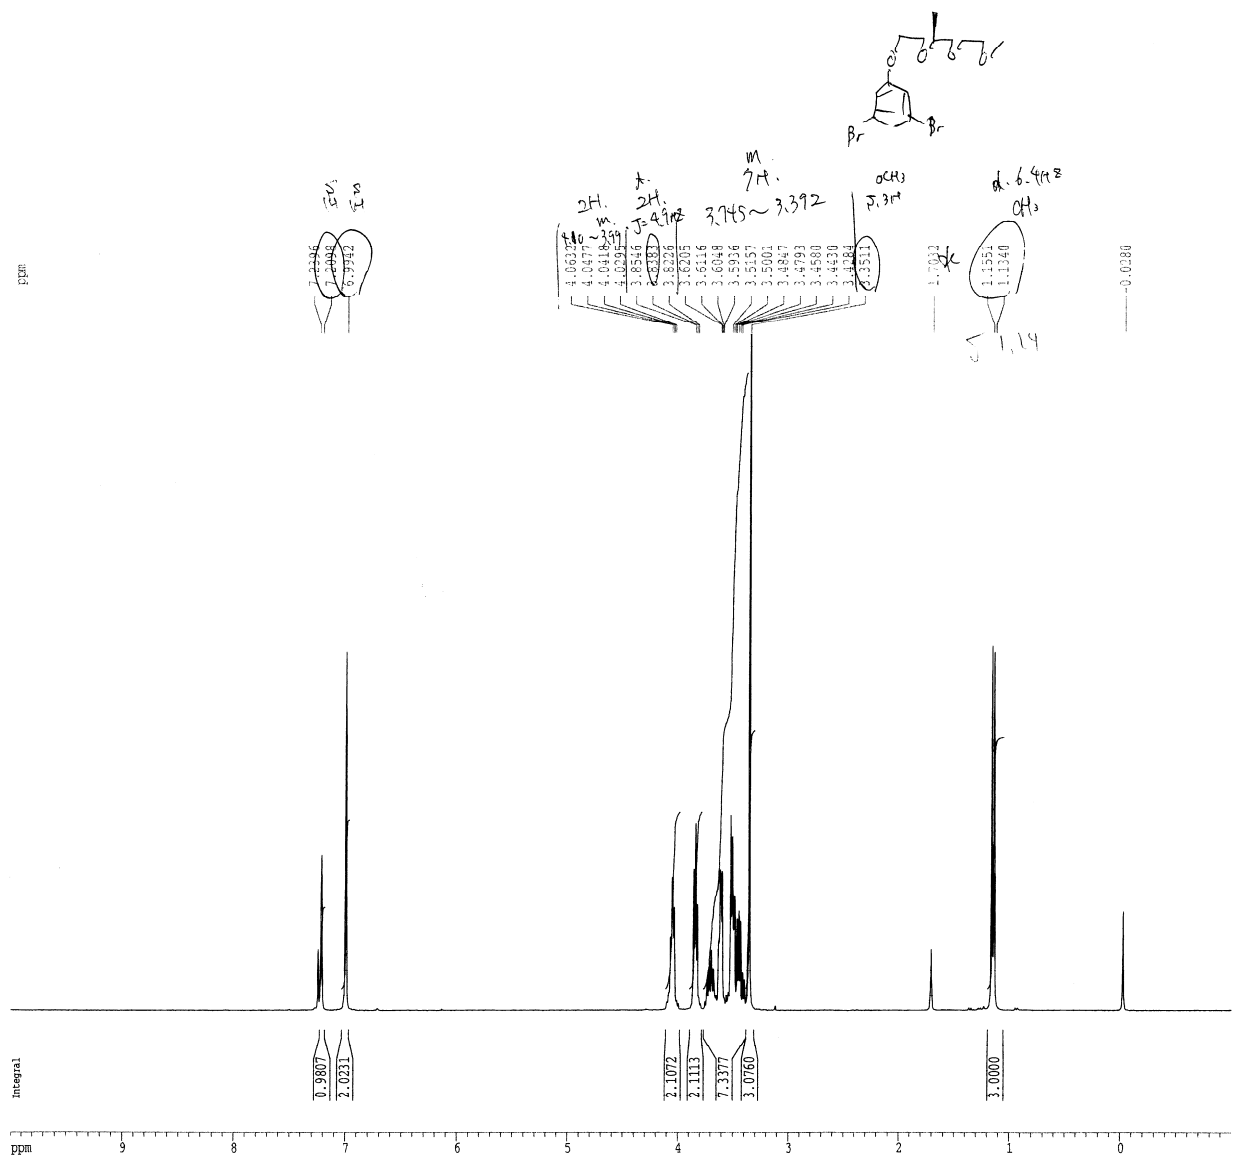

Figure 4S. <sup>1</sup>H NMR spectra of **4** in CDCl<sub>3</sub>.

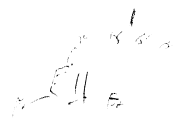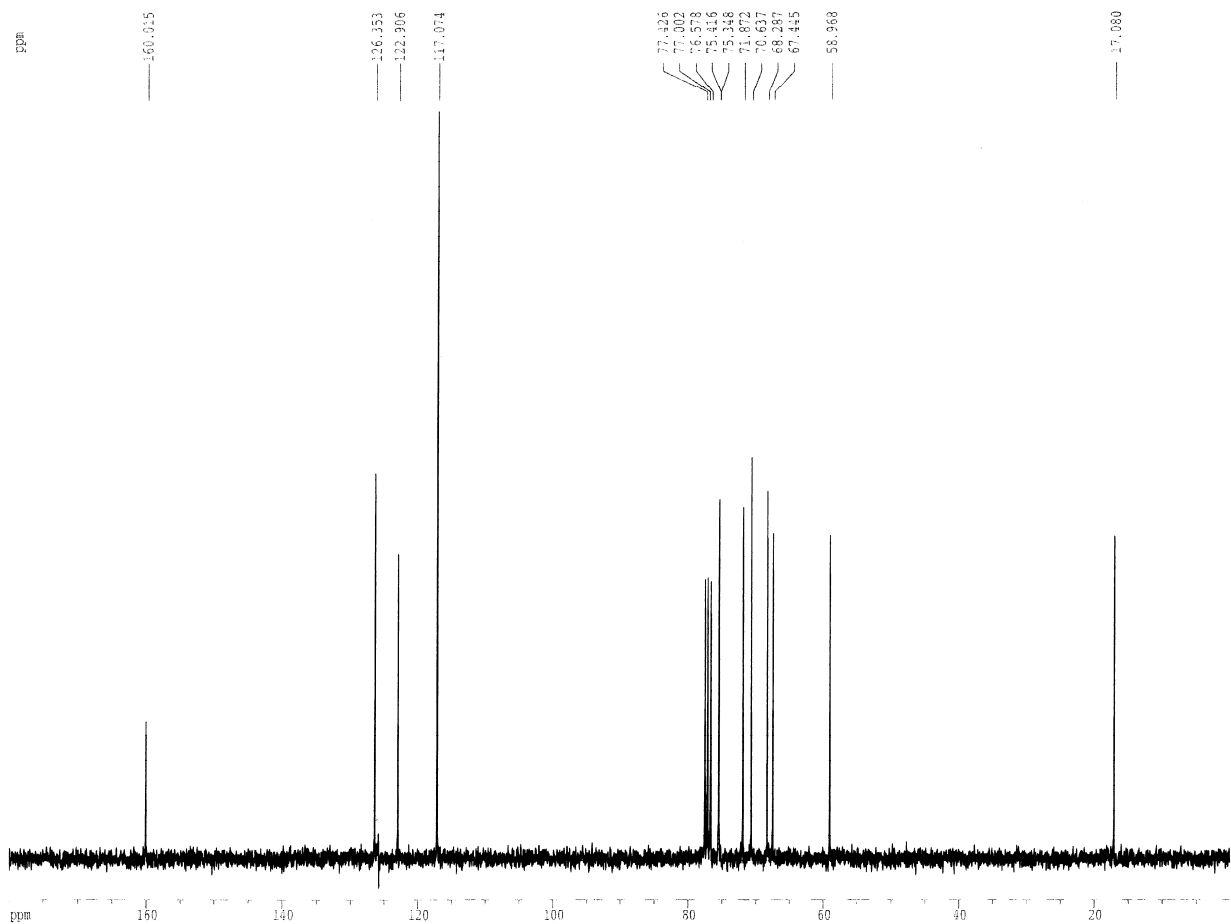

Current Data Parameters  
NAME sato  
EXPNO 707133  
PROCNO 1

F2 - Acquisition Parameters  
Date\_ 500000  
Time 16.11  
INSTRUM dpx300  
PROBHD 5 mm QNP 1H  
PULPROG zgpg30  
TD 65536  
SOLVENT CDCl3  
NS 98  
DS 2  
SMH 23809.523 Hz  
FIDRES 0.363304 Hz  
AQ 1.3763061 sec  
RG 4597.6  
DH 21.000 usec  
DE 4.50 usec  
TE 300.0 K  
D12 0.0002000 sec  
PL13 16.00 dB  
D1 1.0000000 sec  
CPDPRG2 waltz16  
PCPD2 100.00 usec  
SFO2 300.1312005 MHz  
NUC2 1H  
PL2 -6.00 dB  
PL12 16.00 dB  
P1 5.70 usec  
DE 4.50 usec  
SFO1 75.4772501 MHz  
NUC1 13C  
PL1 -6.00 dB  
D11 0.0300000 sec

F2 - Processing parameters  
ST 32768  
SF 75.4677559 MHz  
WDW EM  
SSB 0  
LB 1.00 Hz  
GB 0  
PC 1.40

1D NMR plot parameters  
CX 30.00 cm  
F1P 180.000 ppm  
F1 13584.20 Hz  
F2P 0.000 ppm  
F2 0.00 Hz  
PPMCM 6.00000 ppm/cm  
HZCM 452.80655 Hz/cm

Figure S5. <sup>13</sup>C NMR spectra of **4** in CDCl<sub>3</sub>.



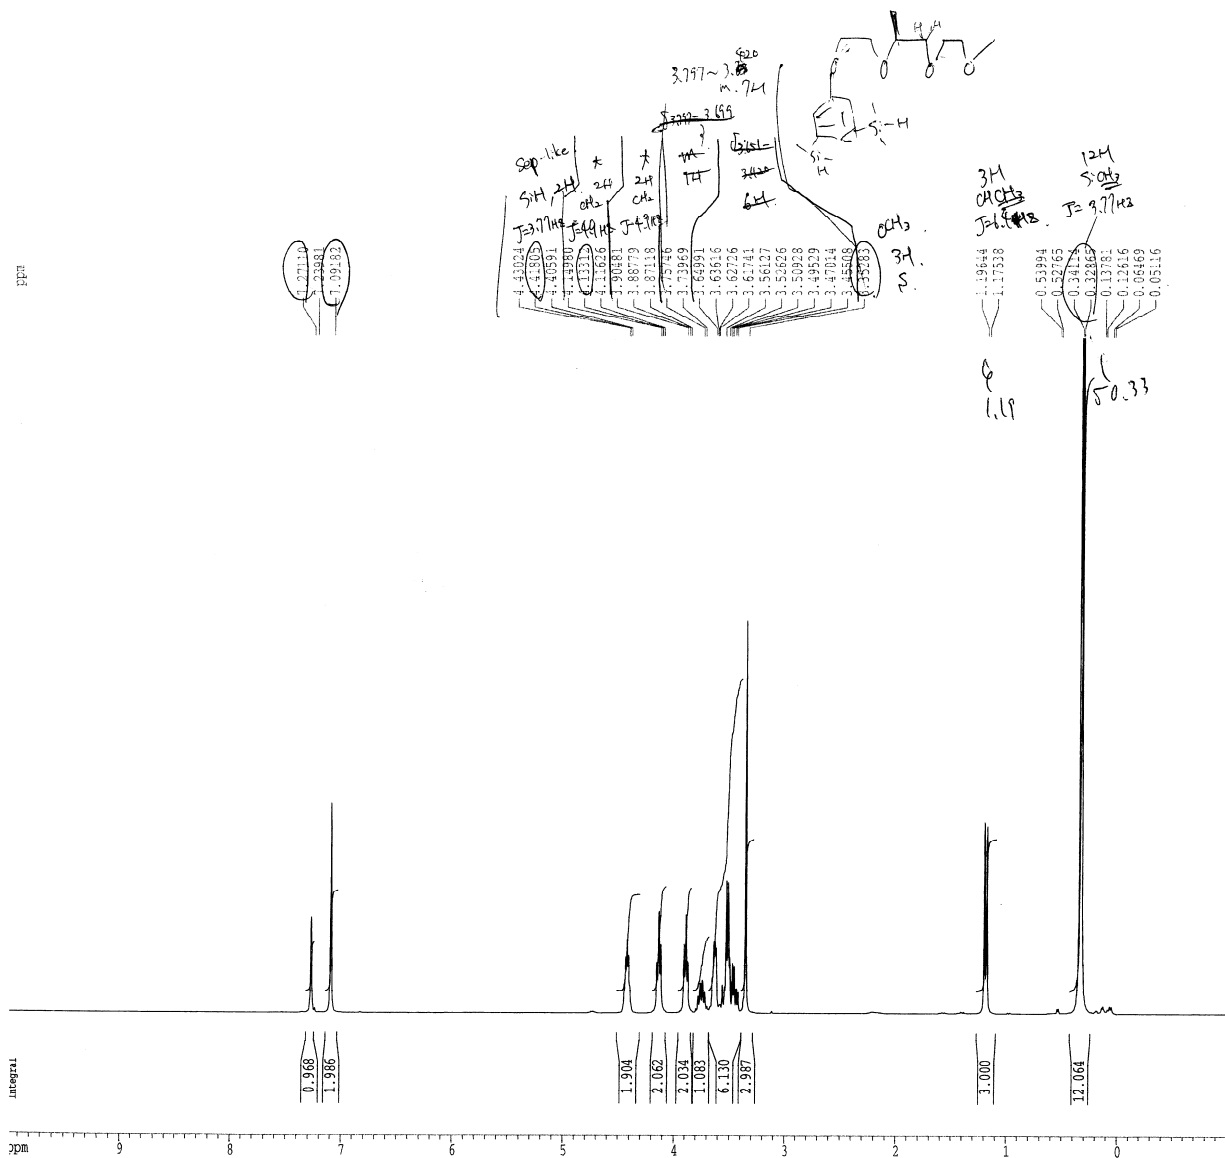

Figure 6S. <sup>1</sup>H NMR spectra of **3** in CDCl<sub>3</sub>.

HS-Mez  
E  
S. Mezt

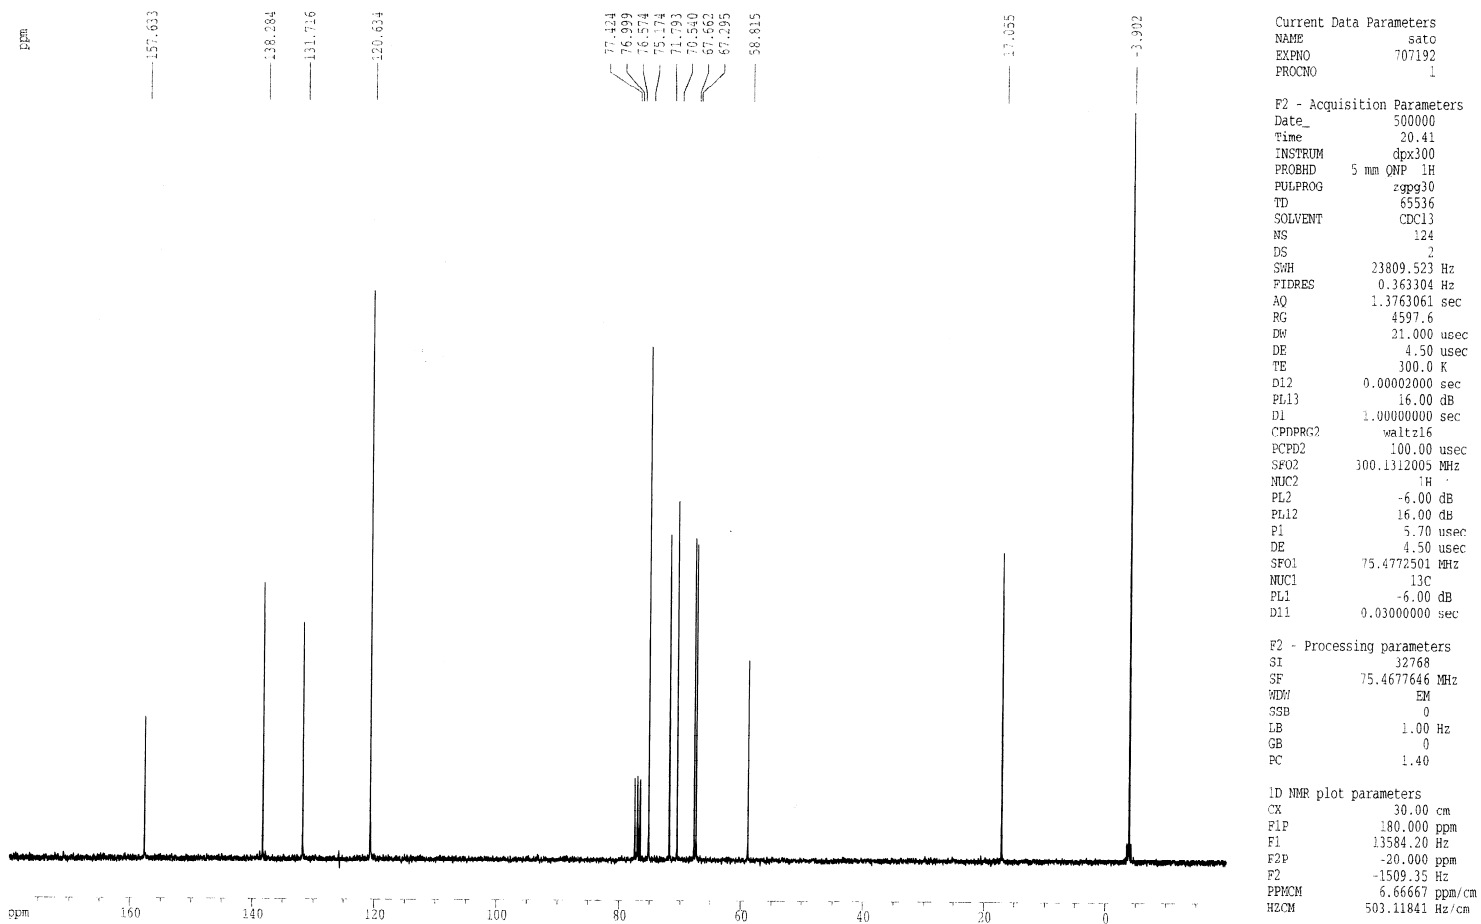

Figure 7S.  $^{13}\text{C}$  NMR spectra of **3** in  $\text{CDCl}_3$ .

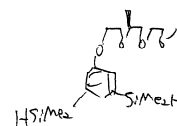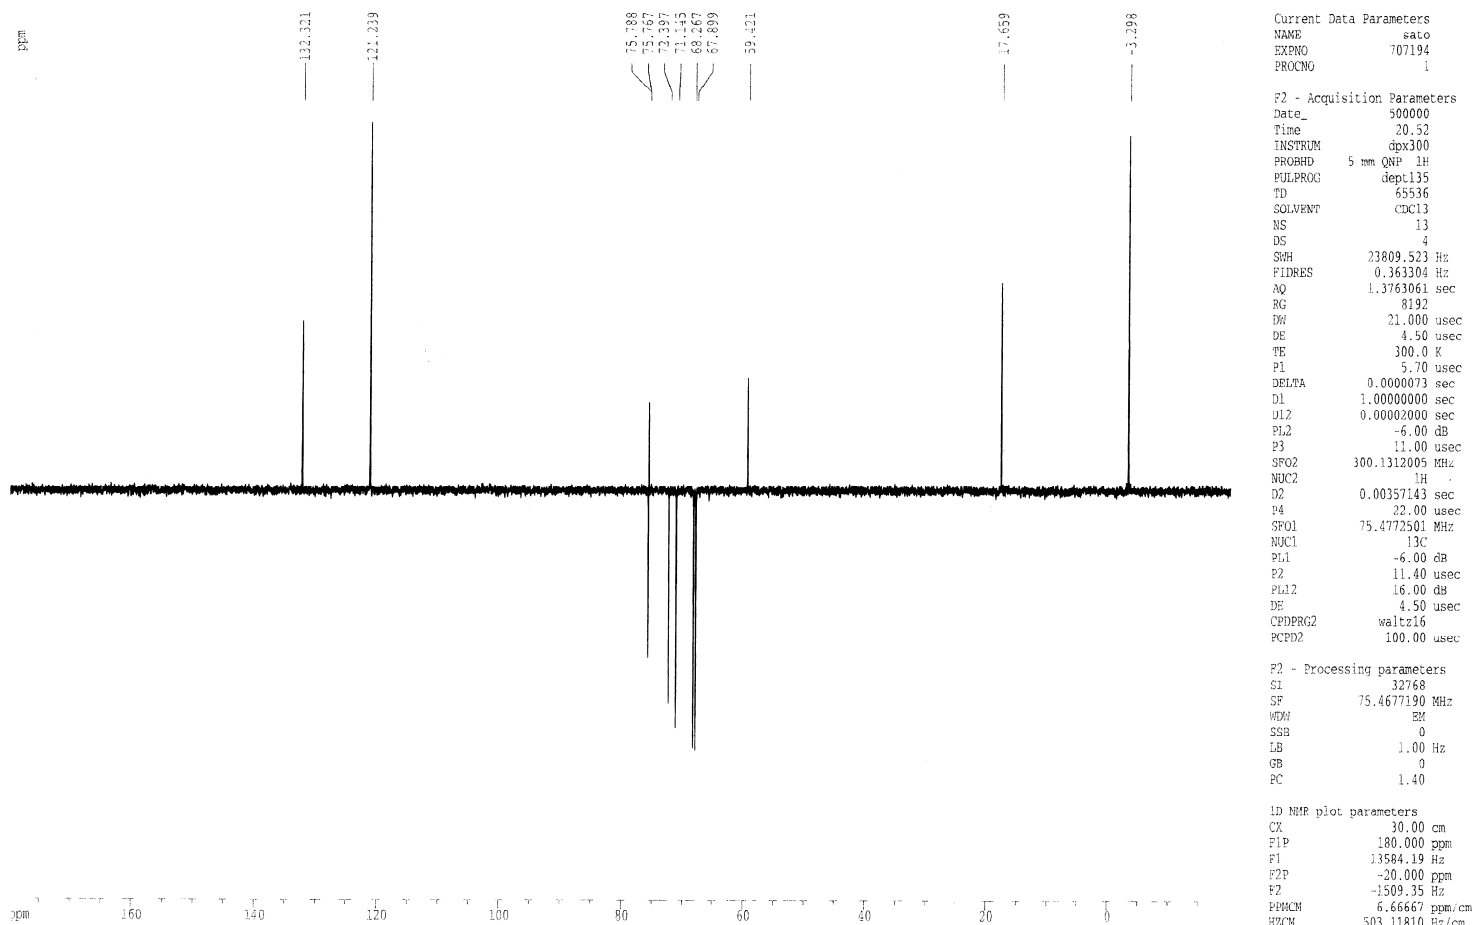

Figure 8S.  $^{13}\text{C}$  NMR dept spectra of **3** in  $\text{CDCl}_3$ .

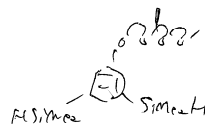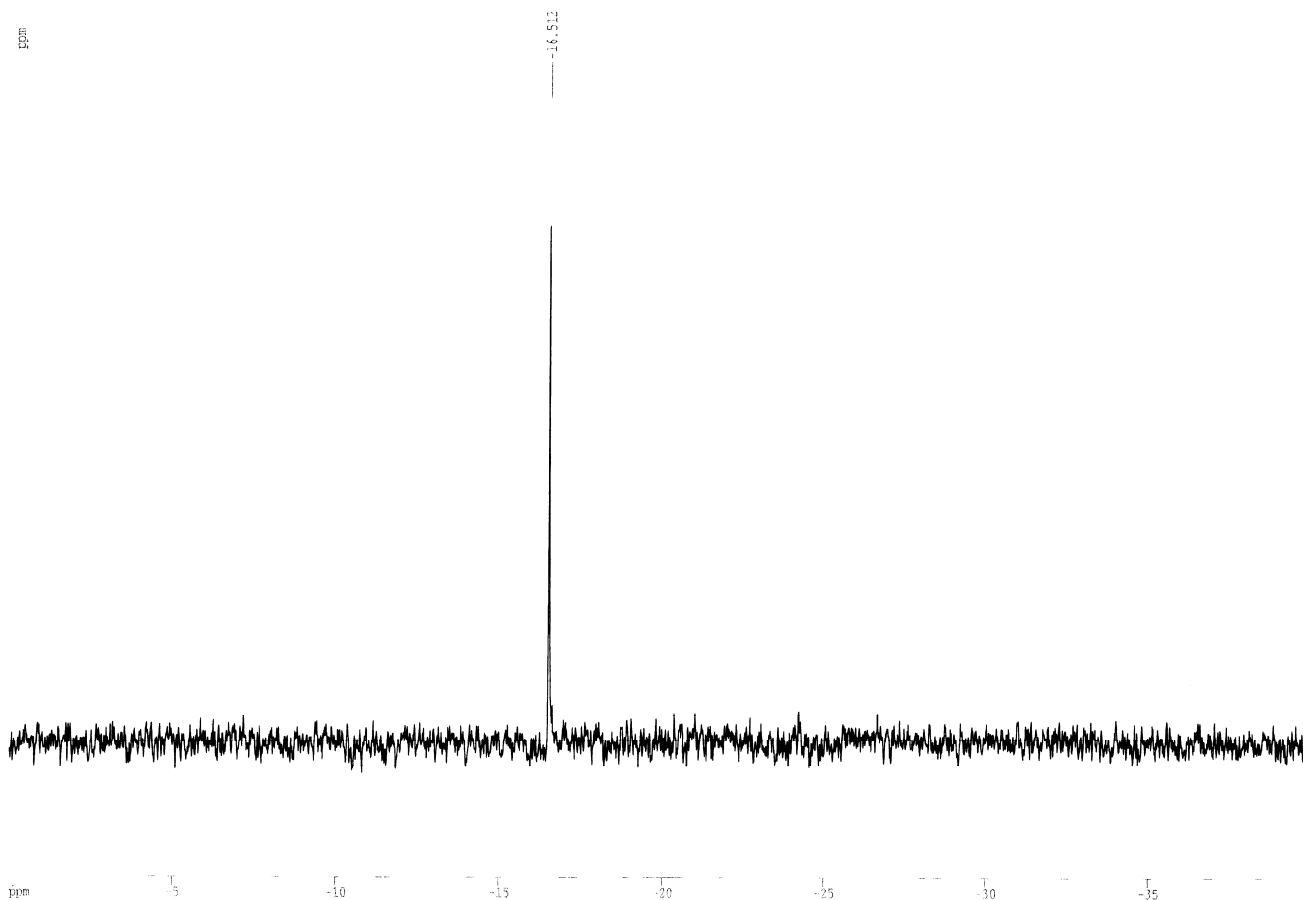

Current Data Parameters

NAME sato  
EXPNO 707193  
PROCNO 1

F2 - Acquisition Parameters

Date\_ 500000  
Time 21.14  
INSTRUM dpx300  
PROBHD 5 mm QNP 1H  
PULPROG zgig30  
TD 65536  
SOLVENT C6D6  
NS 90  
DS 2  
SWH 11904.762 Hz  
FIDRES 0.181652 Hz  
AQ 2.7525620 sec  
RG 256  
DW 42.000 usec  
DE 4.50 usec  
TE 300.0 K  
D11 0.03000000 sec  
PL12 16.00 dB  
D1 10.00000000 sec  
P1 6.70 usec  
DE 4.50 usec  
SFO1 59.6243916 MHz  
NUC1 29Si  
PL1 -6.00 dB  
CPDPRG2 waltz16  
PCPD2 100.00 usec  
SFO2 300.1312005 MHz  
NUC2 1H  
PL2 -6.00 dB

F2 - Processing parameters

SI 32768  
SF 59.6273730 MHz  
WDW EM  
SSB 0  
LB 1.00 Hz  
GB 0  
PC 1.40

1D NMR plot parameters

CX 32.00 cm  
F1P 0.000 ppm  
F1 0.00 Hz  
F2P -40.000 ppm  
F2 -2385.09 Hz  
PPMCM 1.25000 ppm/cm  
HZCM 74.53422 Hz/cm

Figure 9S. <sup>29</sup>Si NMR spectra of 3 in CDCl<sub>3</sub>.

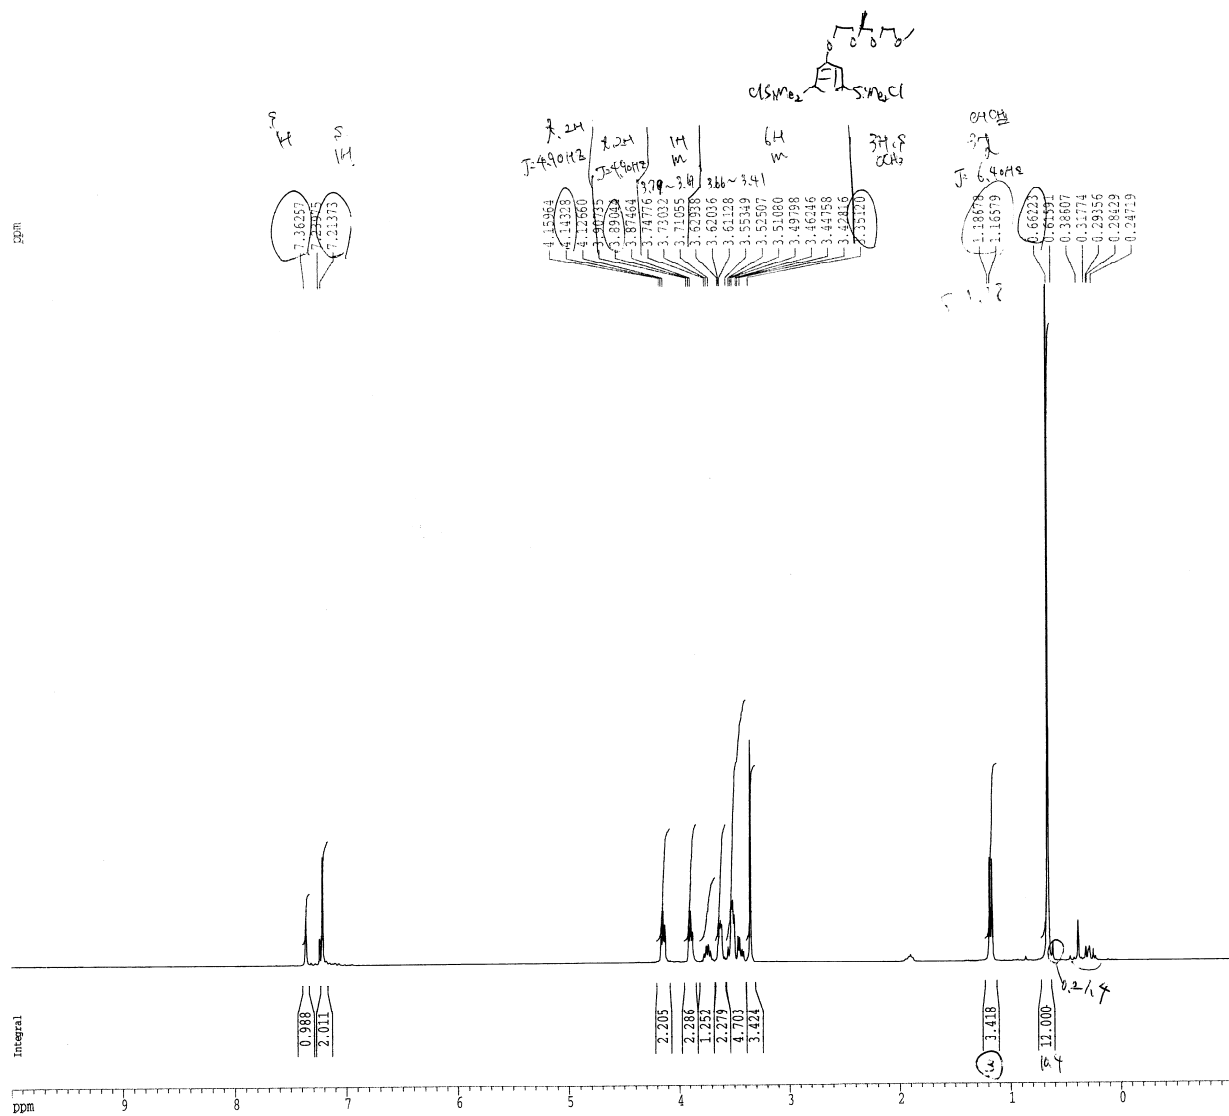

Figure 10S. <sup>1</sup>H NMR spectra of **m-2b** in CDCl<sub>3</sub>.

HS-Mez  
E  
S. Mezt



Figure 11S.  $^{13}\text{C}$  NMR spectra of **m-2b** in  $\text{CDCl}_3$ .

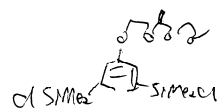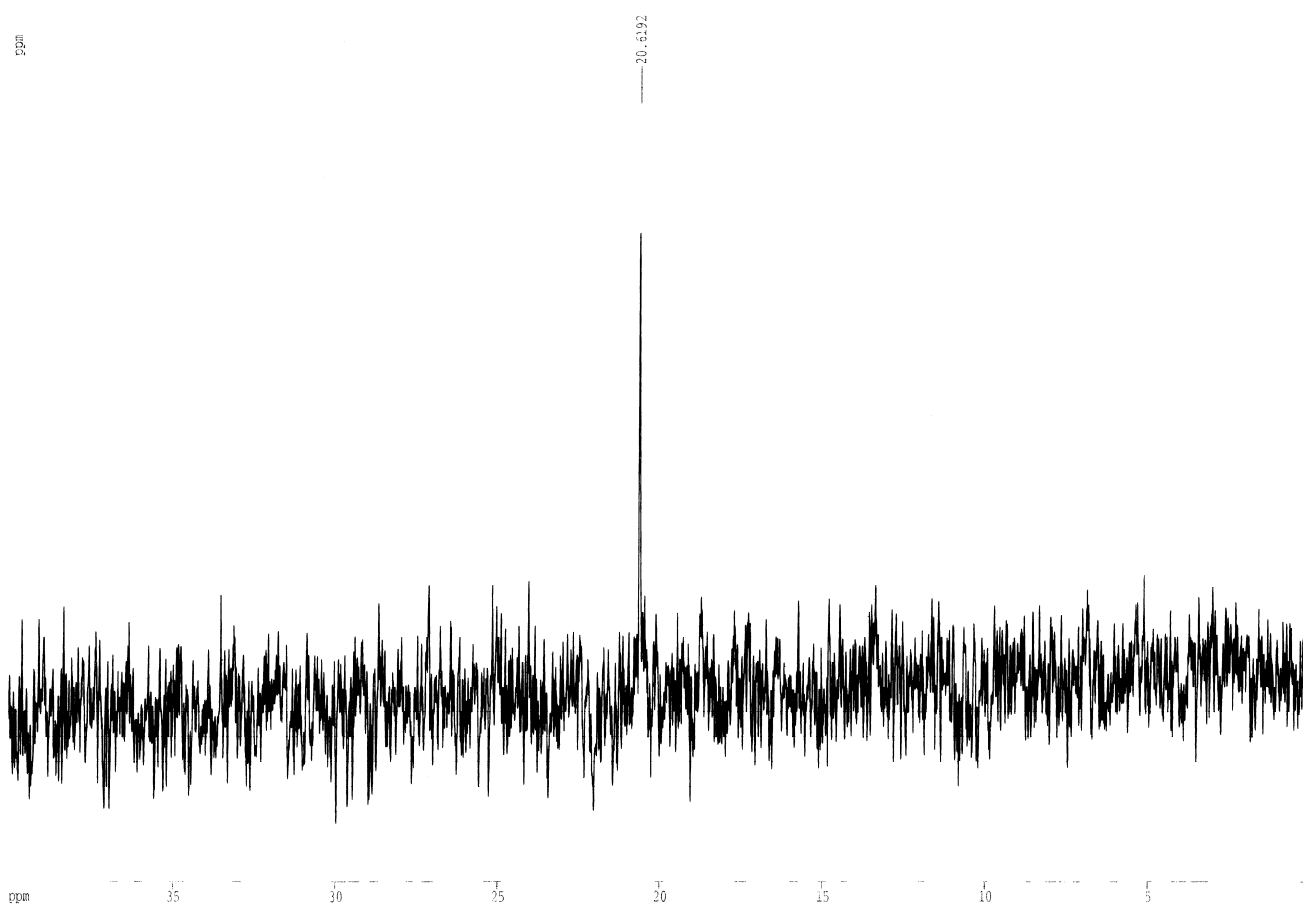

```
Current Data Parameters
NAME      sato
EXPNO     707233
PROCNO    1

F2 - Acquisition Parameters
Date_     500000
Time      14.47
INSTRUM   dpx300
PROBHD    5 mm QNP 1H
PULPROG   zgpg30
TD         65536
SOLVENT   C6D6
NS         18
DS         2
SWH        11904.762 Hz
FIDRES     0.181652 Hz
AQ         2.7525620 sec
RG         128
DW         42.000 usec
DE         4.50 usec
TE         300.0 K
D11        0.03000000 sec
PL12       16.00 dB
D1         10.00000000 sec
P1         6.70 usec
DE         4.50 usec
SFO1       59.6243916 MHz
NUC1       29si
PL1        -6.00 dB
CPDPRG2   waltz16
PCPD2     100.00 usec
SFO2       300.1312005 MHz
NUC2       1H
PL2        -6.00 dB

F2 - Processing parameters
SI         32768
SF         59.6273730 MHz
WDW        EM
SSB        0
LB         1.00 Hz
GB         0
PC         1.40

ID NMR plot parameters
CX         32.00 cm
F1P        40.000 ppm
F1         2385.09 Hz
F2P        0.000 ppm
F2         0.00 Hz
PPMCM      1.25000 ppm/cm
HZCM       74.53422 Hz/cm
```

Figure 12S. <sup>29</sup>Si NMR spectra of **m-2b** in CDCl<sub>3</sub>.





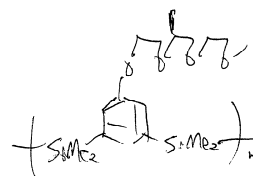

Mn 334  
 Mw 1053

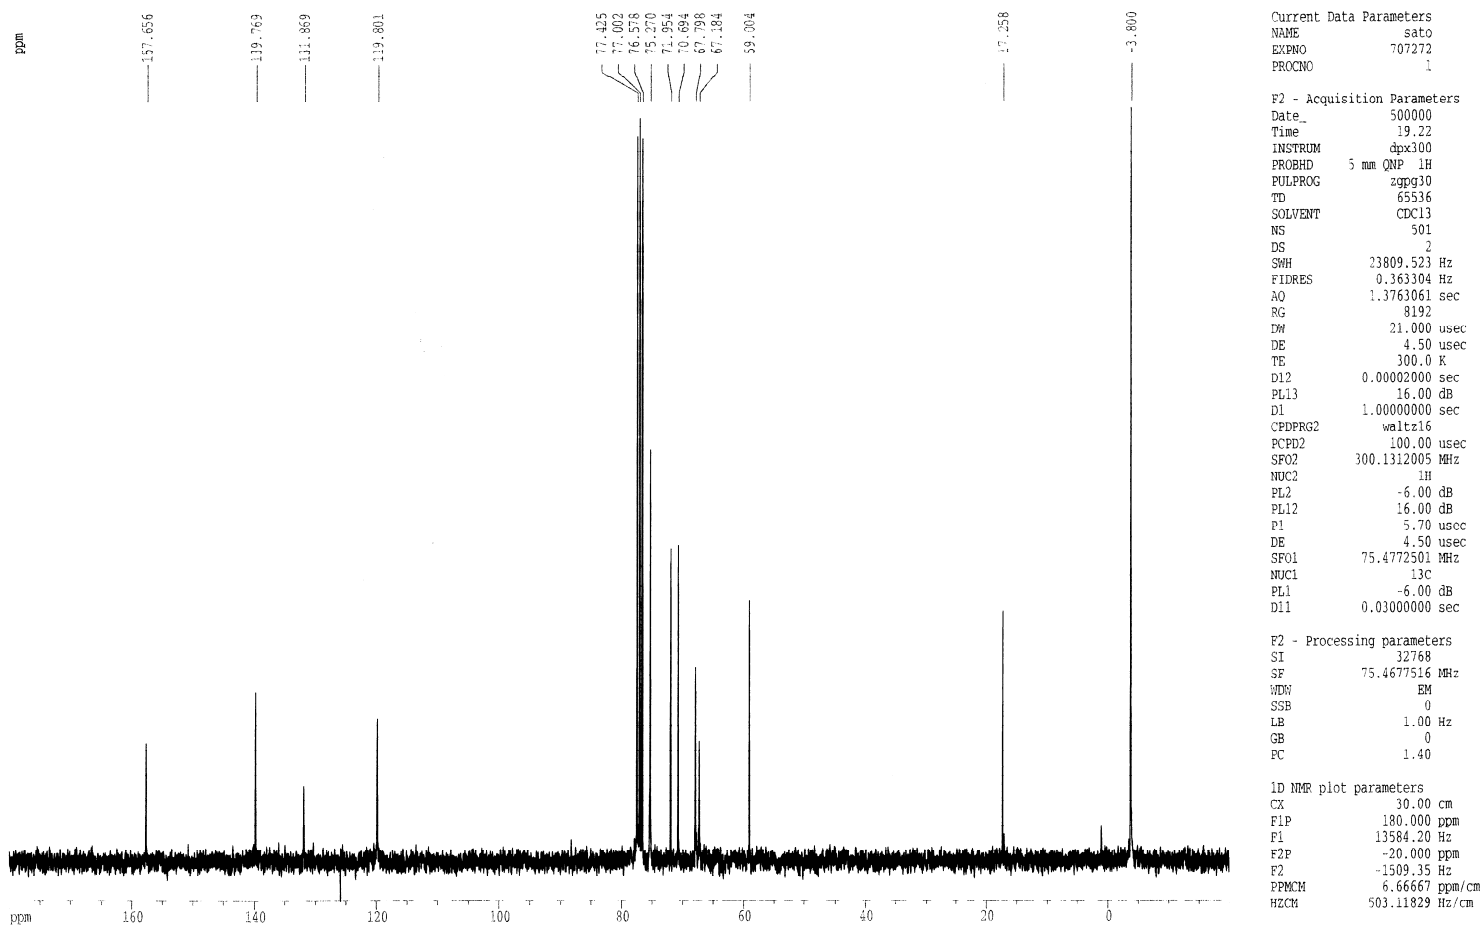

Figure 14S. <sup>13</sup>C NMR spectra of m-1b in CDCl<sub>3</sub>.

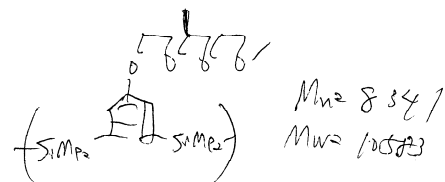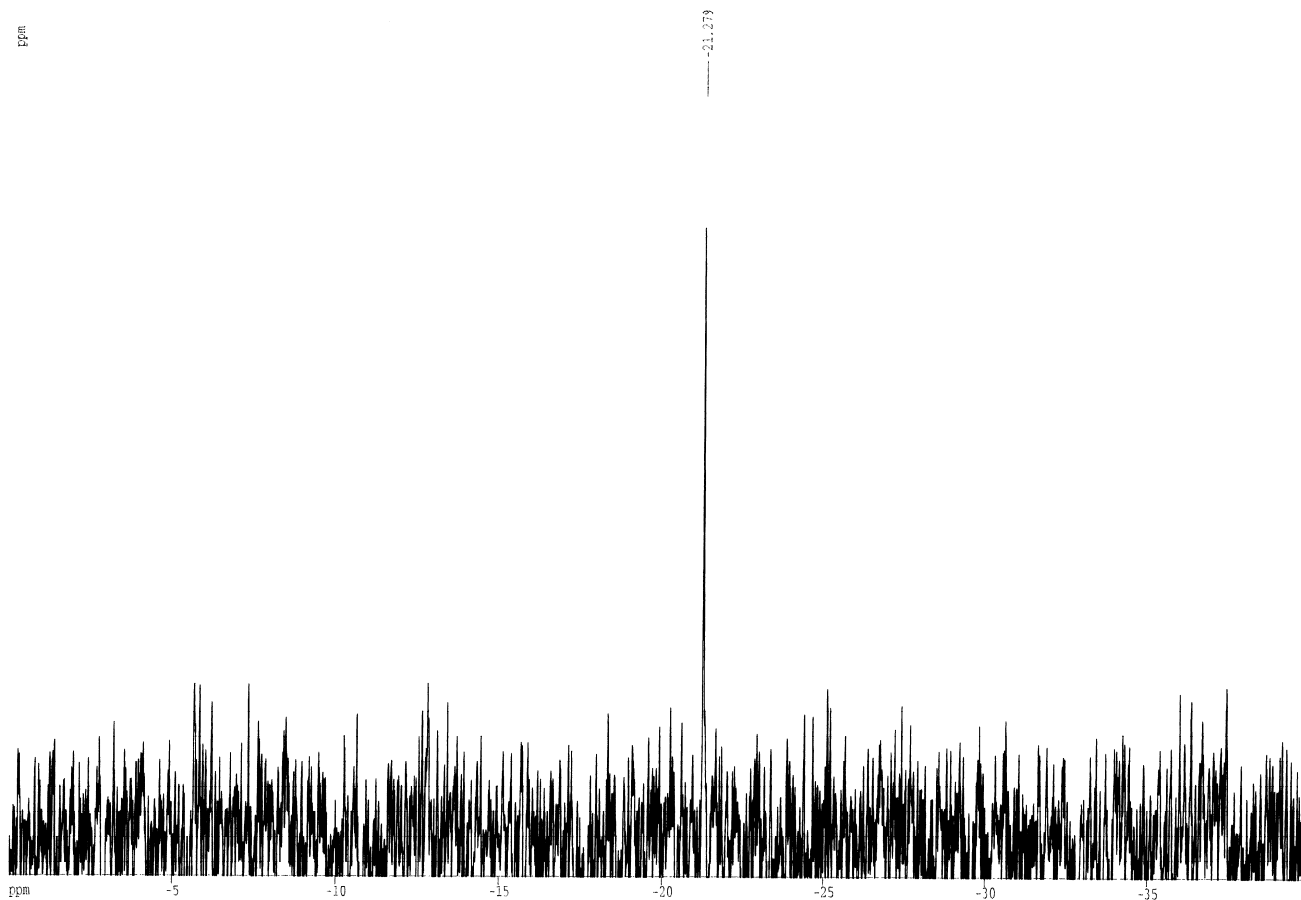

Current Data Parameters  
NAME sato  
EXPNO 707273  
PROCNO 1

F2 - Acquisition Parameters  
Date\_ 500000  
Time 19.45  
INSTRUM dpx300  
PROBHD 5 mm QNP 1H  
PULPROG zgpg30  
TD 65536  
SOLVENT C6D6  
NS 22  
DS 2  
SWH 11904.762 Hz  
FIDRES 0.181652 Hz  
AQ 2.7525620 sec  
RG 256  
DW 42.000 usec  
DE 4.50 usec  
TE 300.0 K  
D11 0.03000000 sec  
PL12 16.00 dB  
D1 10.00000000 sec  
P1 6.70 usec  
DE 4.50 usec  
SFO1 59.6243916 MHz  
NUC1 29Si  
PL1 -6.00 dB  
CPDPRG2 waltz16  
PCPD2 100.00 usec  
SFO2 300.1312005 MHz  
NUC2 1H  
PL2 -6.00 dB

F2 - Processing parameters  
SI 32768  
SF 59.6273730 MHz  
WDW EM  
SSB 0  
LB 1.00 Hz  
GB 0  
PC 1.40

1D NMR plot parameters  
CK 32.00 cm  
F1P 0.000 ppm  
F1 0.00 Hz  
F2P -40.000 ppm  
F2 -2385.09 Hz  
PPMCM 1.25000 ppm/cm  
HZCM 74.53422 Hz/cm

Figure 15S.  $^{29}\text{Si}$  NMR spectra of **m-1b** in  $\text{CDCl}_3$ .

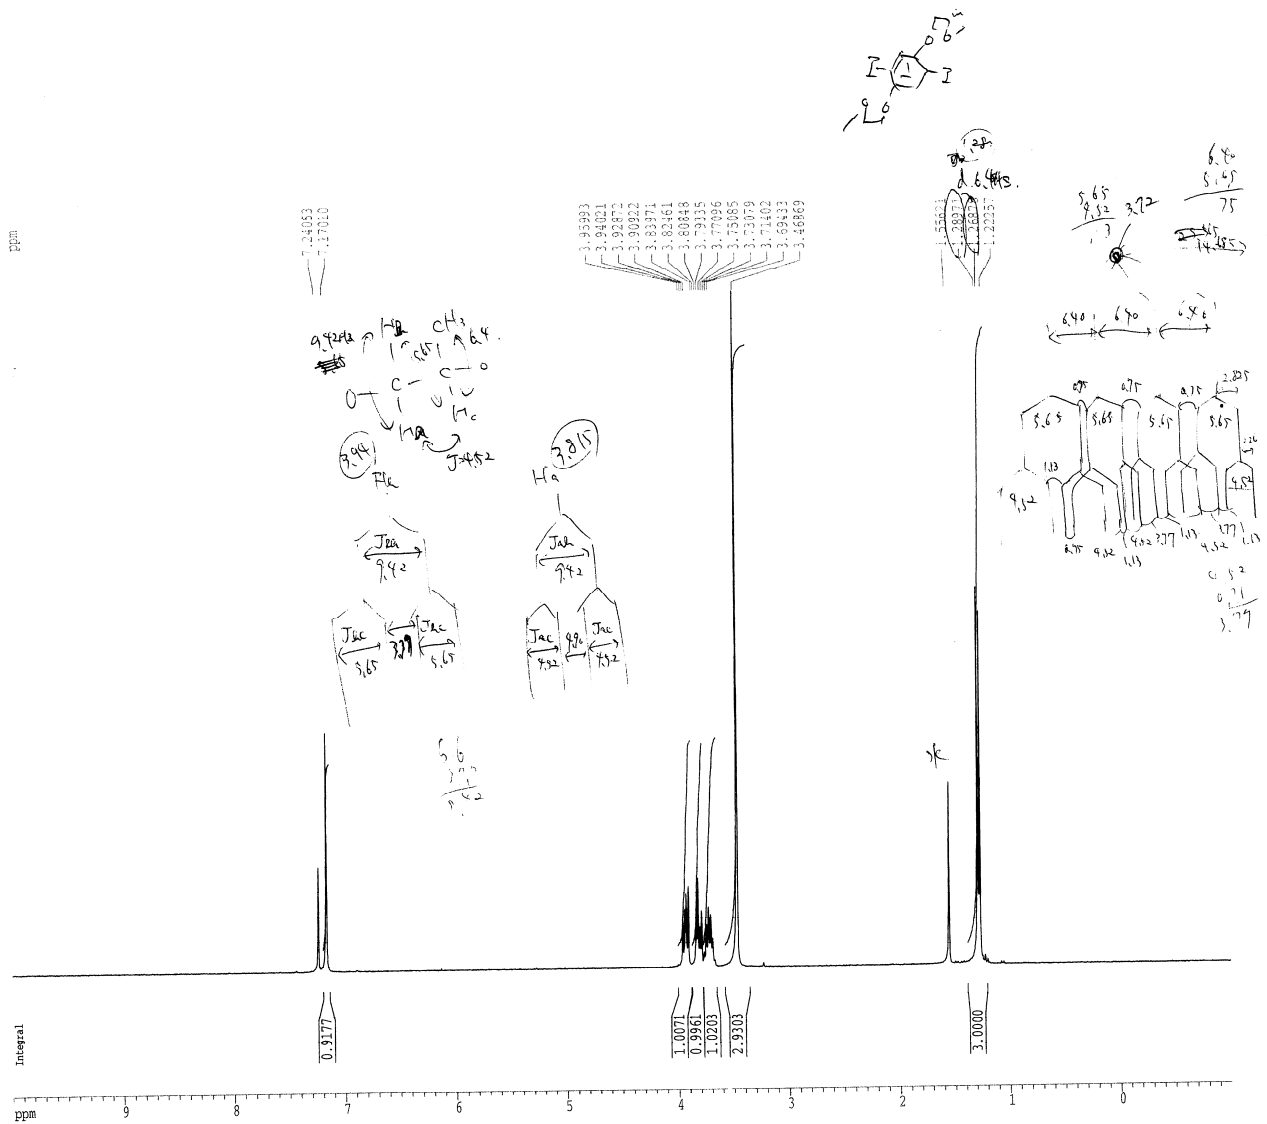

Figure 16S. <sup>1</sup>H NMR spectra of **8** in CDCl<sub>3</sub>.

071009 C1=CC=C(C=C1)C2=CC=CC=C2

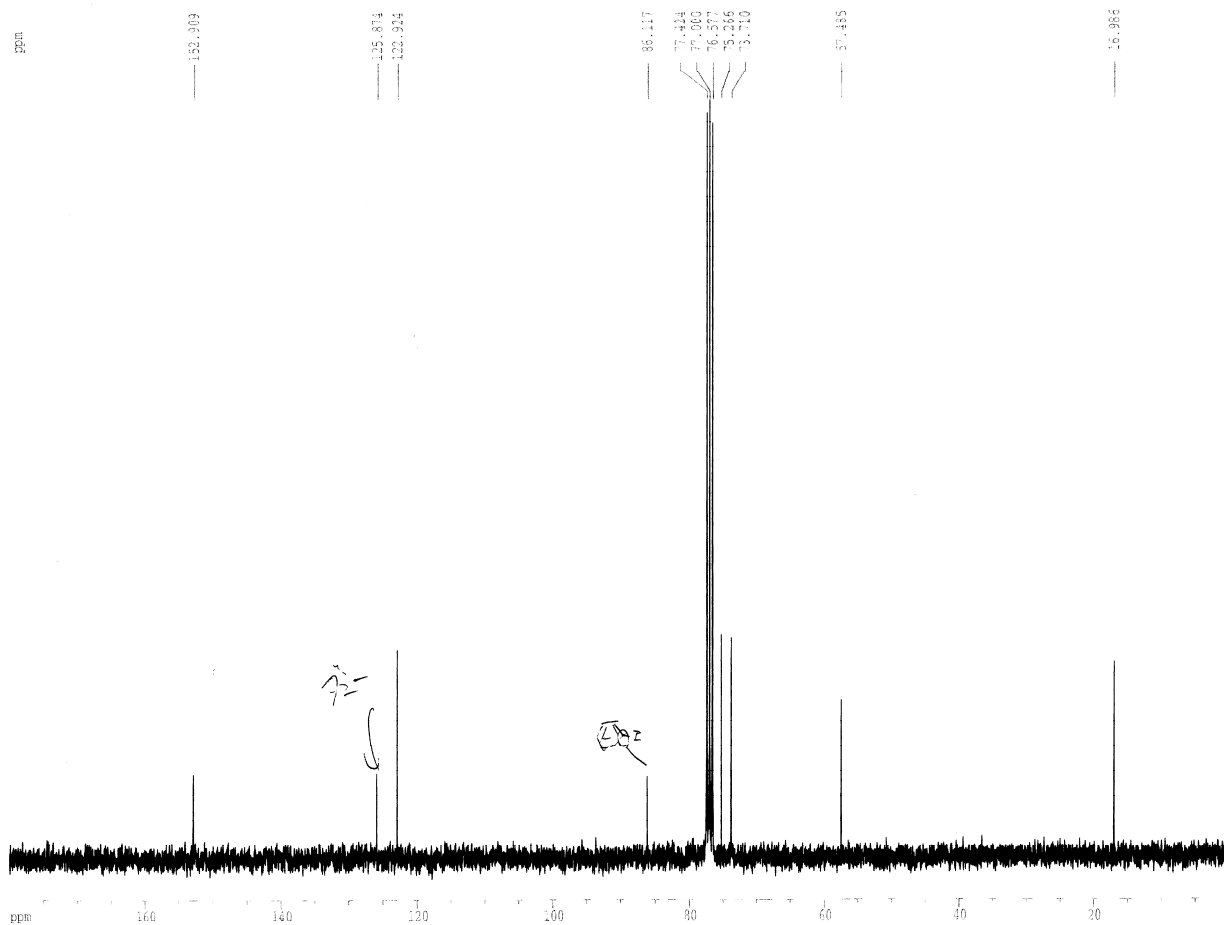

Current Data Parameters  
NAME sato  
EXPNO 710163  
PROCNO 1

F2 - Acquisition Parameters  
Date\_ 500000  
Time 18.42  
INSTRUM dpx300  
PROBHD 5 mm QNP 1H  
PULPROG zgpg30  
TD 65536  
SOLVENT CDCl3  
NS 458  
DS 2  
SWH 23809.523 Hz  
FIDRES 0.363304 Hz  
AQ 1.3763061 sec  
RG 5792.6  
DM 21.000 usec  
DE 4.50 usec  
TE 300.0 K  
D12 0.00002000 sec  
PL12 16.00 dB  
D1 1.00000000 sec  
CPDPRG2 waltz16  
PCPD2 100.00 usec  
SFO2 300.1312005 MHz  
NUC2 1H  
PL2 -6.00 dB  
PL12 16.00 dB  
P1 5.70 usec  
DE 4.50 usec  
SFO1 75.4772501 MHz  
NUC1 13C  
PL1 -6.00 dB  
D11 0.03000000 sec

F2 - Processing parameters  
SI 32768  
SF 75.4677508 MHz  
WDW EM  
SSB 0  
LB 1.00 Hz  
GB 0  
PC 1.40

1D NMR plot parameters  
CX 30.00 cm  
F1P 180.000 ppm  
F1 13584.20 Hz  
F2P 0.000 ppm  
F2 0.00 Hz  
PPHCM 6.00000 ppm/cm  
H2CM 452.80652 Hz/cm

Figure 17S.  $^{13}\text{C}$  NMR spectra of **8** in  $\text{CDCl}_3$ .

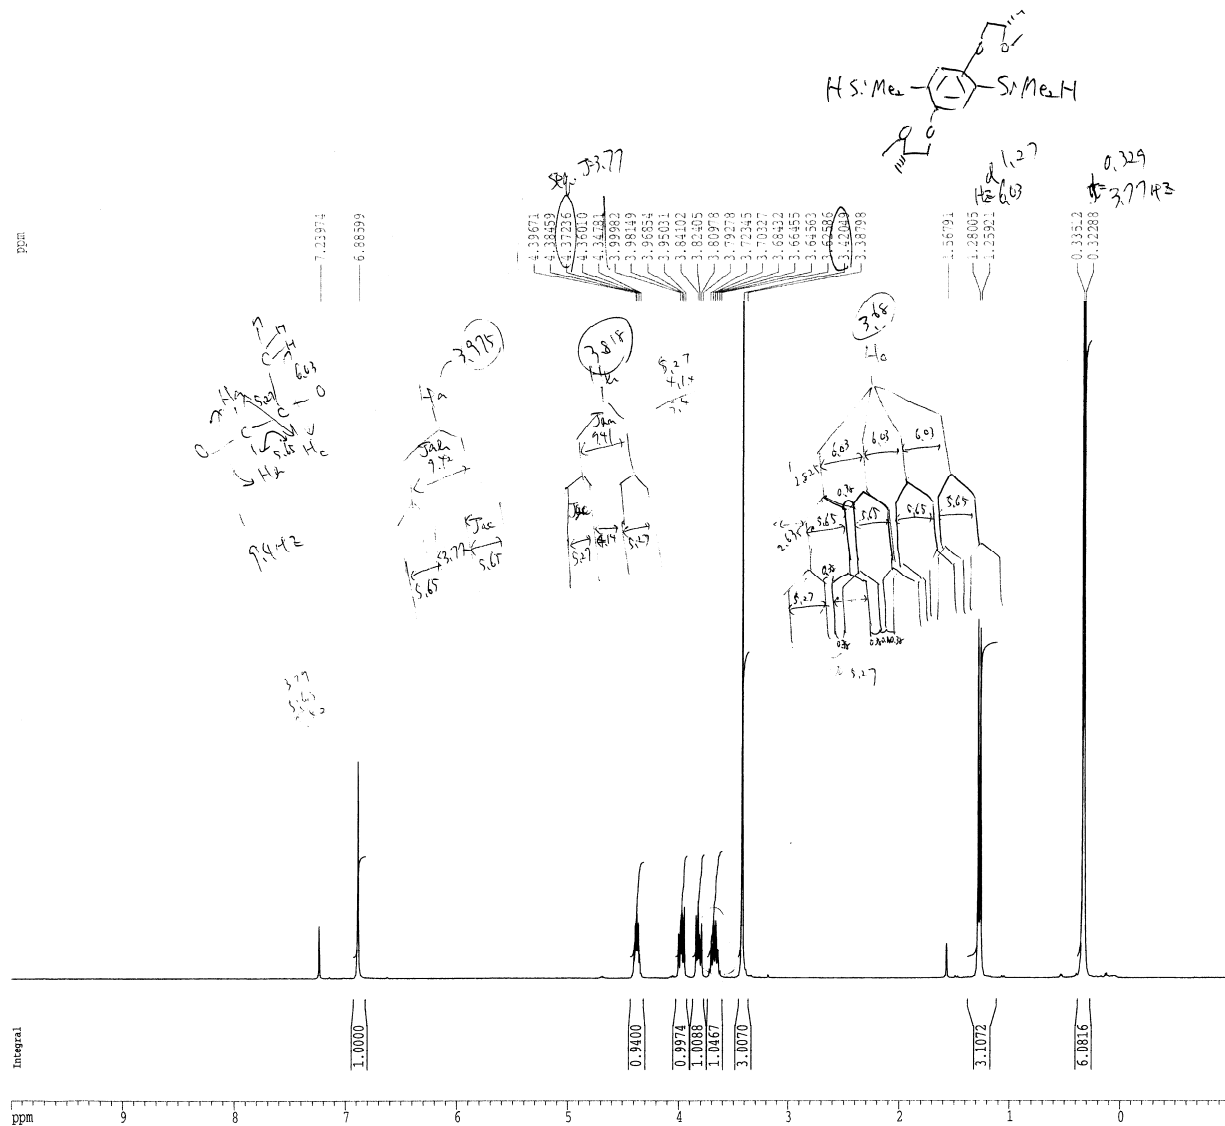

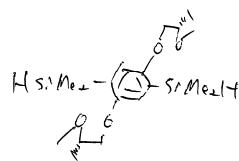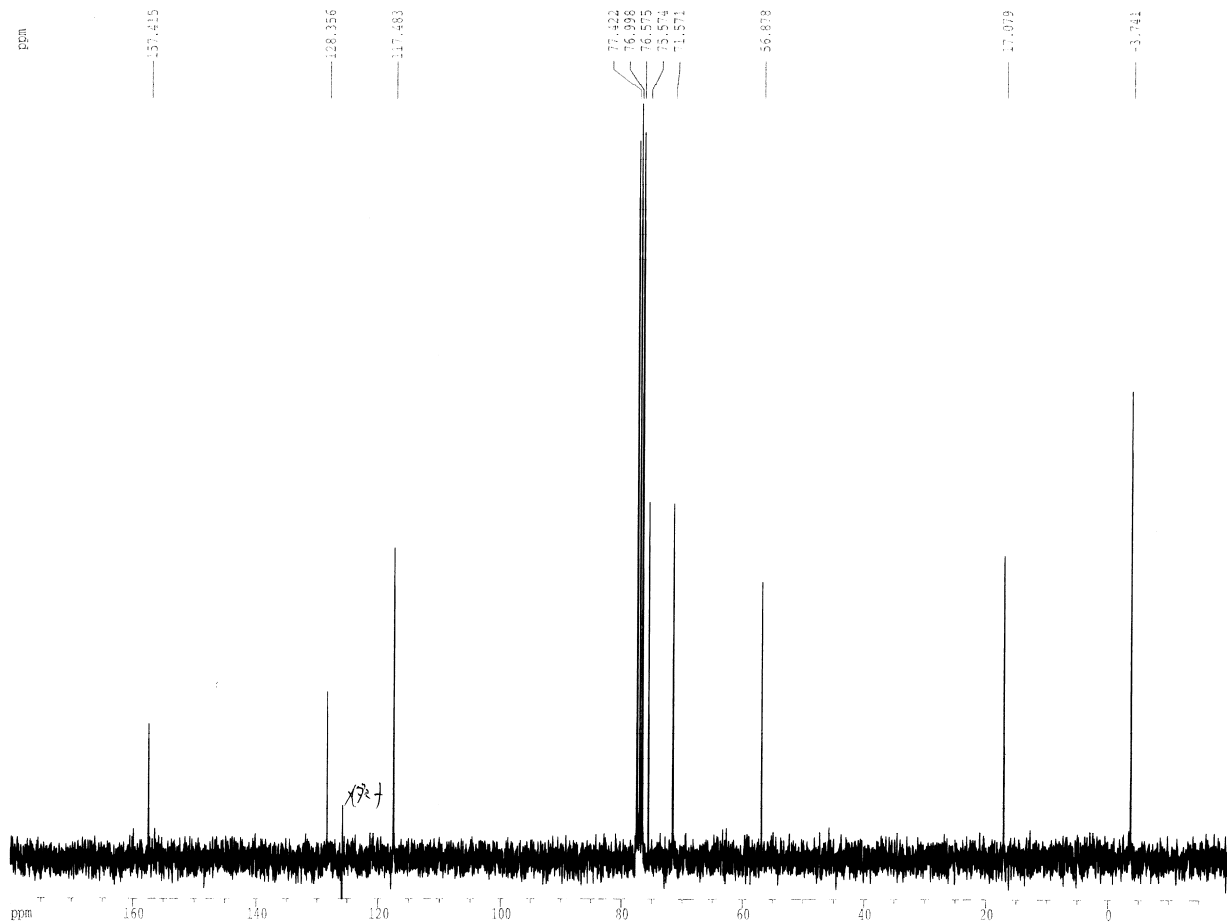

Current Data Parameters  
 NAME ato  
 EXPNO 10223  
 PROCNO 1

F2 - Acquisition Parameters  
 Date\_ 500000  
 Time 13.21  
 INSTRUM dpx300  
 PROBHD 5 mm QNP 1H  
 PULPROG zgpg20  
 TD 65536  
 SOLVENT CDCl3  
 NS 185  
 DS 2  
 SWH 23809.523 Hz  
 FIDRES 0.363304 Hz  
 AQ 1.3763061 sec  
 RG 32768  
 DW 21.000 usec  
 DE 4.50 usec  
 TE 300.0 K  
 D12 0.00002000 sec  
 PL13 16.00 dB  
 D1 1.00000000 sec  
 CPDPRG2 waltz16  
 PCPE2 100.00 usec  
 SFO2 300.1312005 MHz  
 NUC2 1H  
 PL2 -6.00 dB  
 PL12 16.00 dB  
 P1 5.70 usec  
 DE 4.50 usec  
 SFO1 75.4772501 MHz  
 NUC1 13C  
 PL1 -6.00 dB  
 D11 0.03000000 sec

F2 - Processing parameters  
 SI 32768  
 SF 75.4677508 MHz  
 FWHM EM  
 SSB 0  
 LB 1.00 Hz  
 GB 0  
 PC 1.40

1D NMR plot parameters  
 CX 30.00 cm  
 FLP 180.000 ppm  
 FL 13584.20 Hz  
 FZP -20.000 ppm  
 FZ -1509.35 Hz  
 PPMCH 6.66667 ppm/cm  
 HZCH 503.11829 Hz/cm

Figure 19S. <sup>13</sup>C NMR spectra of 7 in CDCl<sub>3</sub>.

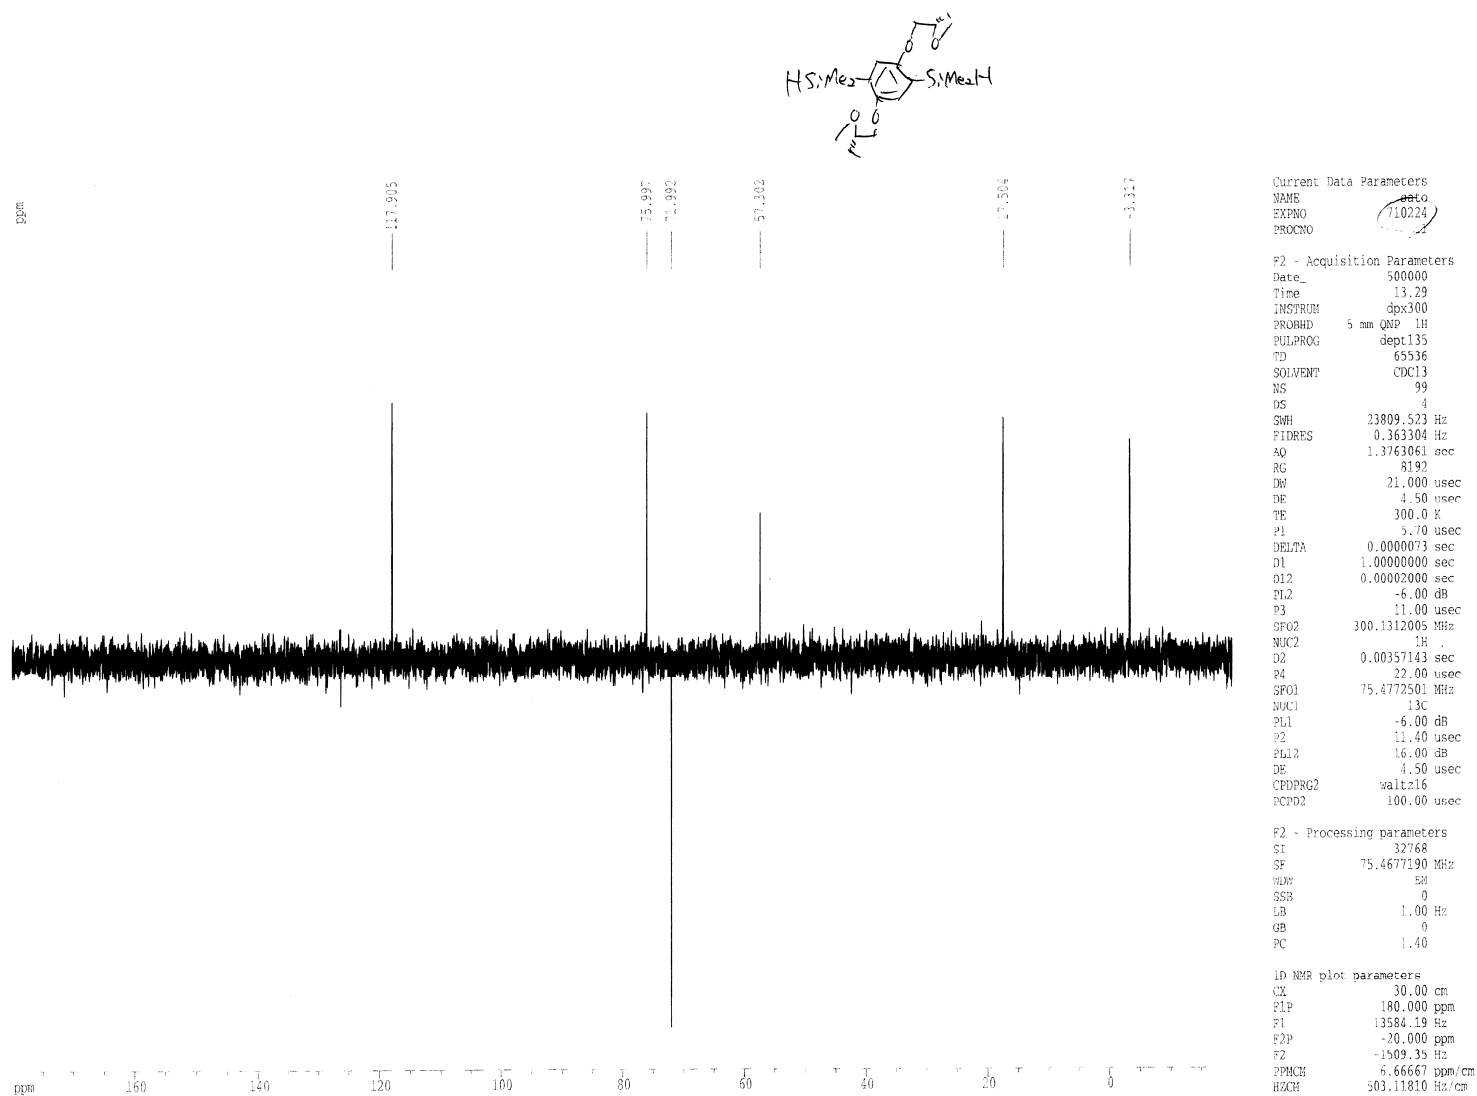

Figure 20S. <sup>13</sup>C dept NMR spectra of 7 in CDCl<sub>3</sub>.

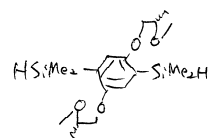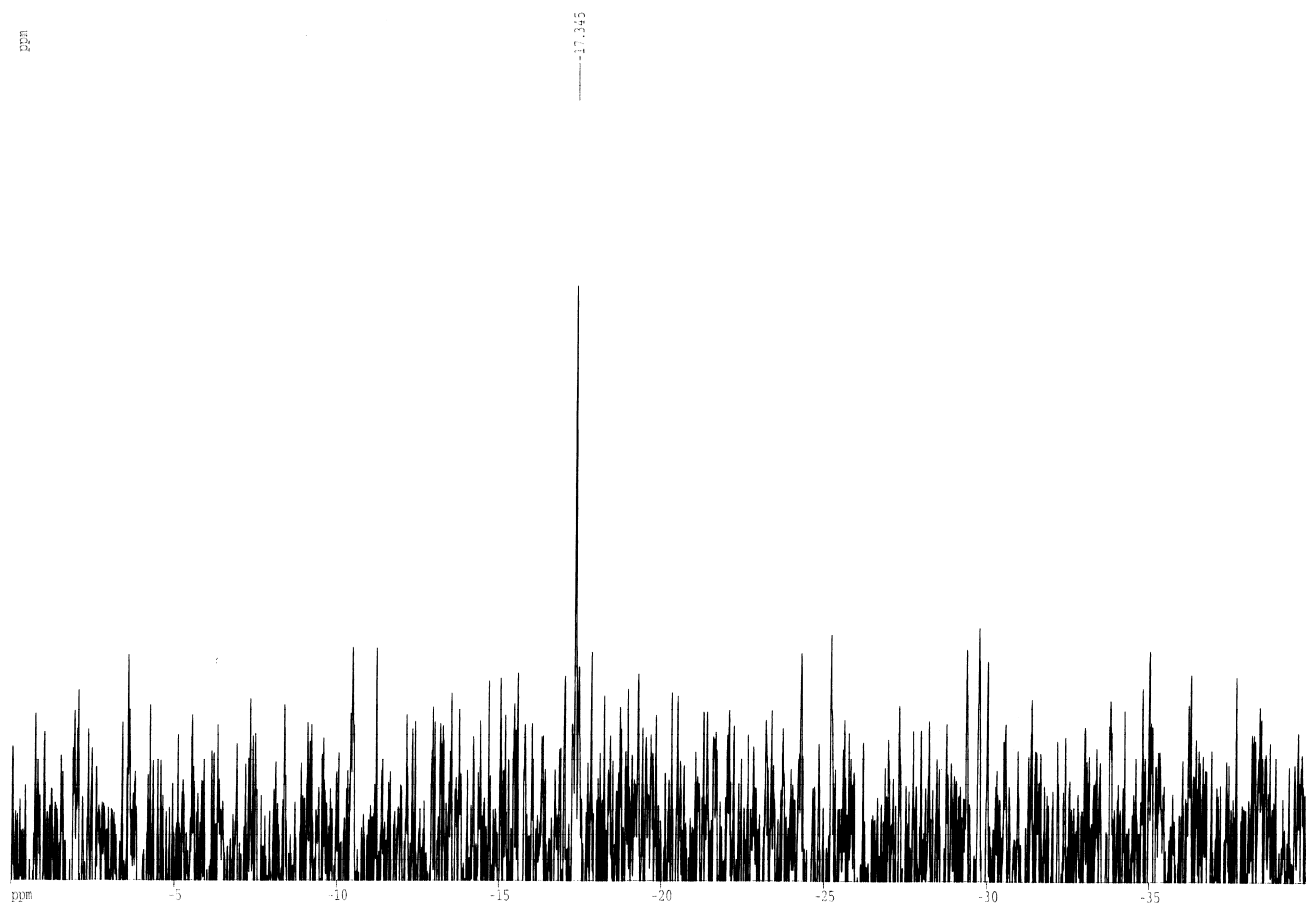

Current Data Parameters  
NAME sat0  
EXPNO 710225  
PROCNO 1

F2 - Acquisition Parameters  
Date\_ 500000  
Time 13.39  
INSTRUM gpc300  
PROBHD 5 mm QNP 1H  
PULPROG zgpg30  
TD 65536  
SOLVENT C6D6  
NS 114  
DS 2  
SWH 11904.762 Hz  
FIDRES 0.181652 Hz  
AQ 2.7525620 sec  
RG 256  
DW 42.000 usec  
DE 4.50 usec  
TE 300.0 K  
D11 0.03000000 sec  
PL12 16.00 dB  
D1 10.00000000 sec  
P1 6.70 usec  
DE 4.50 usec  
SF01 59.6243916 MHz  
NUC1 29Si  
PL1 -6.00 dB  
CPDPRG2 waltz16  
PCPD2 100.00 usec  
SF02 300.1312005 MHz  
NUC2 1H  
PL2 -6.00 dB

F2 - Processing parameters  
SI 32768  
SF 59.6273730 MHz  
WDW EM  
SSB 0  
LB 1.00 Hz  
GB 0  
PC 1.40

1D NMR plot parameters  
CX 32.00 cm  
FLP 0.000 ppm  
F1 0.00 Hz  
F2P -40.000 ppm  
F2 -2385.09 Hz  
PPMCM 1.25000 ppm/cm  
HZCM 74.53422 Hz/cm

Figure 21S. <sup>29</sup>Si NMR spectra of **7** in CDCl<sub>3</sub>.





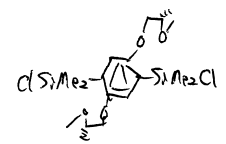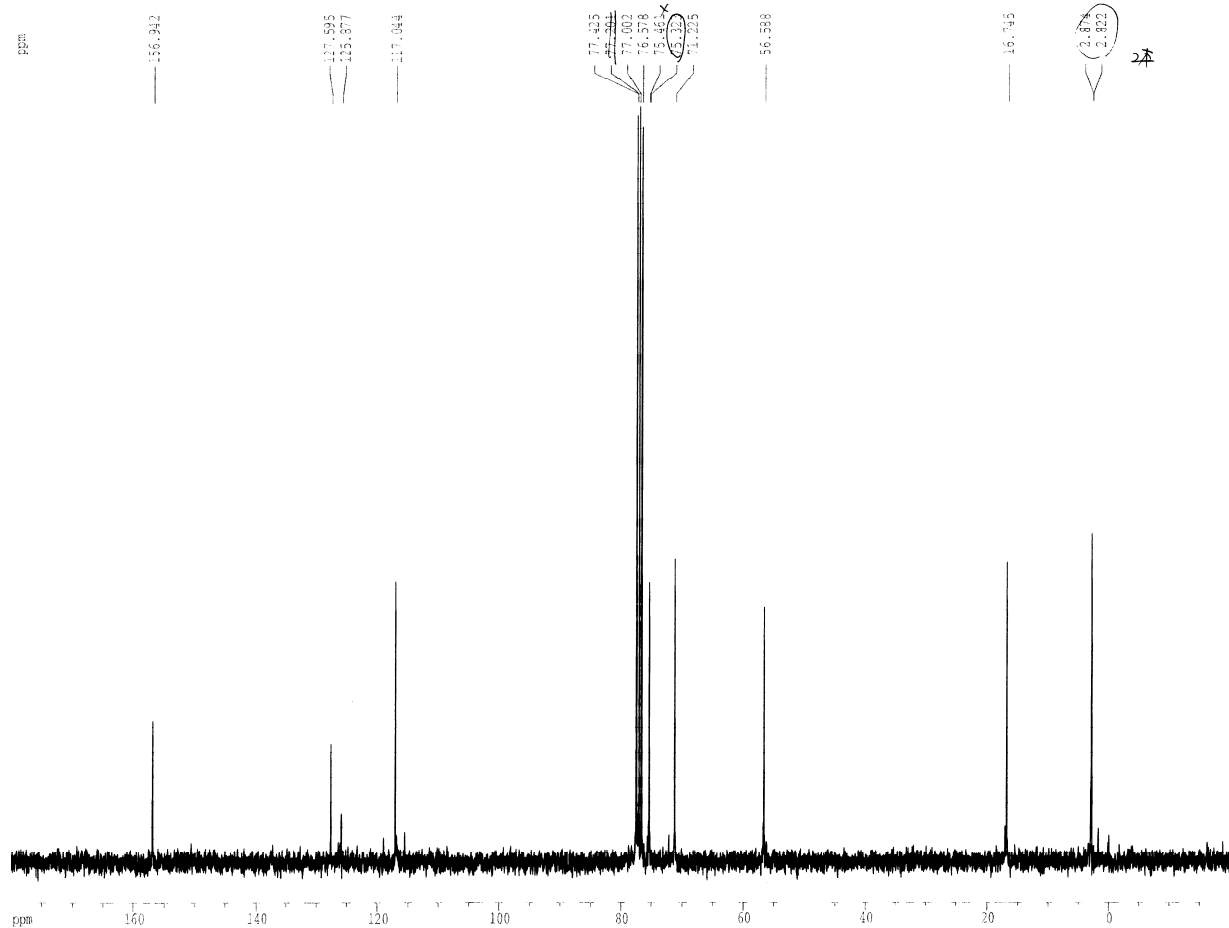

Current Data Parameters  
 NAME Sato  
 EXPNO 711063  
 PROCNO 2

F2 - Acquisition Parameters  
 Date\_ 500000  
 Time 15.10  
 INSTRUM dpx300  
 PROBHND 5 mm QNP 1H  
 PULPROG zgpg30  
 TD 65536  
 SOLVENT CDCl3  
 NS 531  
 DS 2  
 SWH 23809.523 Hz  
 FIDRES 0.363304 Hz  
 AQ 1.3763061 sec  
 RG 4096  
 DN 21.000 usec  
 DE 4.50 usec  
 TE 300.0 K  
 D12 0.00002000 sec  
 PL13 16.00 dB  
 D1 1.00000000 sec  
 CPDPRG2 waltz16  
 PCPD2 100.00 usec  
 SFO2 300.1312005 MHz  
 NUCC2 1H  
 PL2 -6.00 dB  
 PL12 16.00 dB  
 P1 5.70 usec  
 DE 4.50 usec  
 SFO1 75.4772501 MHz  
 NUCC1 13C  
 PL1 -6.00 dB  
 D11 0.03000000 sec

F2 - Processing parameters  
 SI 32768  
 SF 75.4677508 MHz  
 WDW EM  
 SSB 0  
 LB 1.00 Hz  
 GB 0  
 PC 1.40

ID NMR plot parameters  
 CX 30.00 cm  
 P1P 180.000 ppm  
 F1 13584.20 Hz  
 F2P -20.000 ppm  
 F2 -1509.35 Hz  
 PPMCM 6.66667 ppm/cm  
 HZCM 503.11829 Hz/cm

Figure 23S. <sup>13</sup>C NMR spectra of p-2 in CDCl<sub>3</sub>.

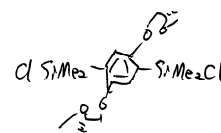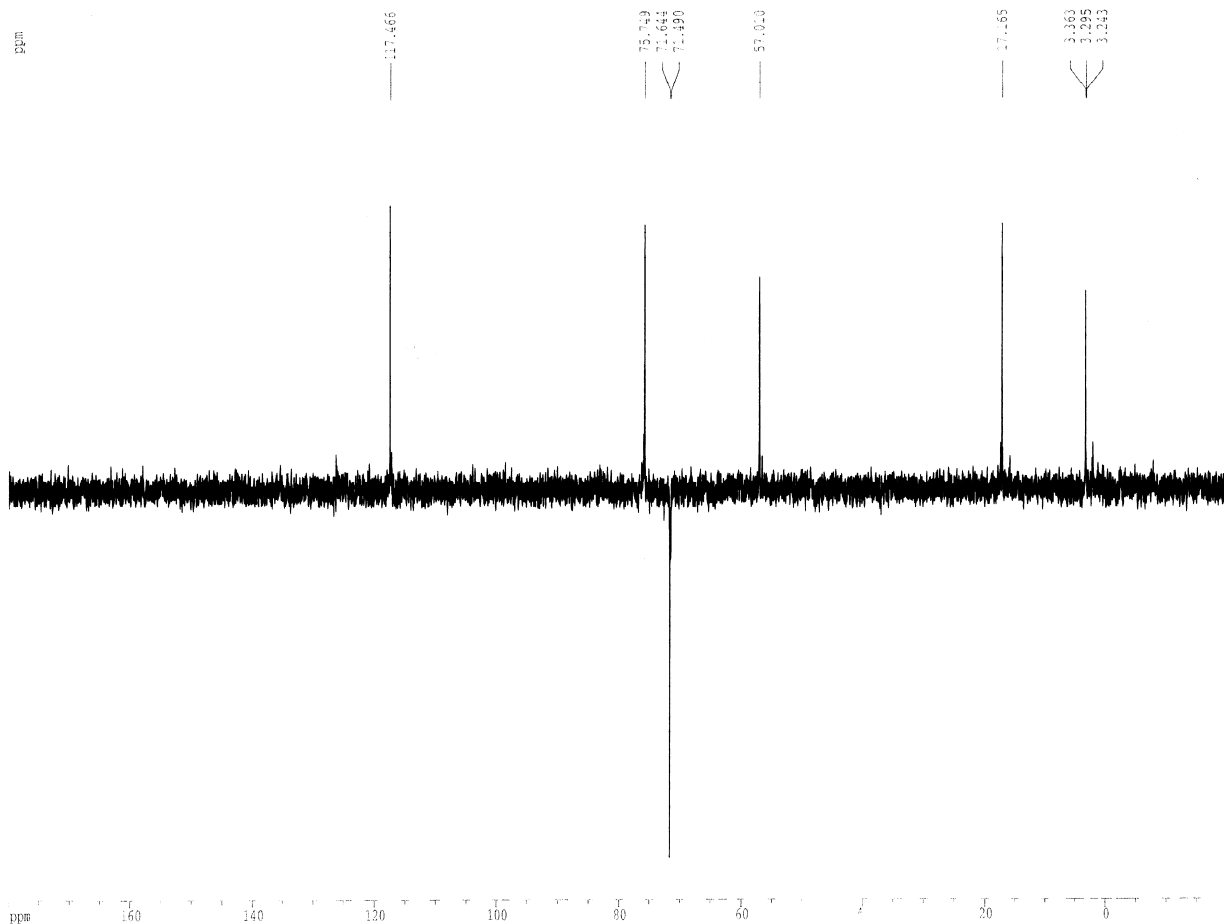

Current Data Parameters  
 NAME satc  
 EXPNO 711064  
 PROCNO 7

F2 - Acquisition Parameters  
 Date\_ 500000  
 Time 15.40  
 INSTRUM dpx100  
 PROBRD 5 mm QNP 1H  
 PULPROG dept135  
 TD 65536  
 SOLVENT CDCl3  
 NS 159  
 DS 4  
 SWH 23809.523 Hz  
 FIDRES 0.363304 Hz  
 AQ 1.3763061 sec  
 RG 8192  
 DW 21.000 usec  
 DE 4.50 usec  
 TE 300.0 K  
 P1 5.70 usec  
 PRG1PA 0.0000073 sec  
 D1 1.00000000 sec  
 d12 0.00002000 sec  
 PL2 -6.00 dB  
 P3 11.00 usec  
 SFO2 300.1312005 MHz  
 NUC2 1H  
 D2 0.00357143 sec  
 M 22.00 usec  
 SFO1 75.4772501 MHz  
 NUC1 13C  
 PL1 -6.00 dB  
 P2 11.40 usec  
 PL12 16.00 dB  
 DE 4.50 usec  
 CPDPRG2 waltz16  
 PCPD2 100.00 usec

F2 - Processing parameters  
 SI 32768  
 SF 75.4671190 MHz  
 MDW 64  
 SSB 0  
 LB 1.00 Hz  
 GB 0  
 PC 1.40

1D NMR plot parameters  
 CX 30.00 cm  
 FLP 180.000 ppm  
 F1 13584.19 Hz  
 F2P -20.000 ppm  
 F2 -1509.35 Hz  
 PRACH 6.66667 ppm/cm  
 HZCM 503.11810 Hz/cm

Figure 24S. <sup>13</sup>C dept NMR spectra of p-2 in CDCl<sub>3</sub>.

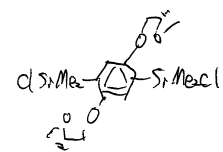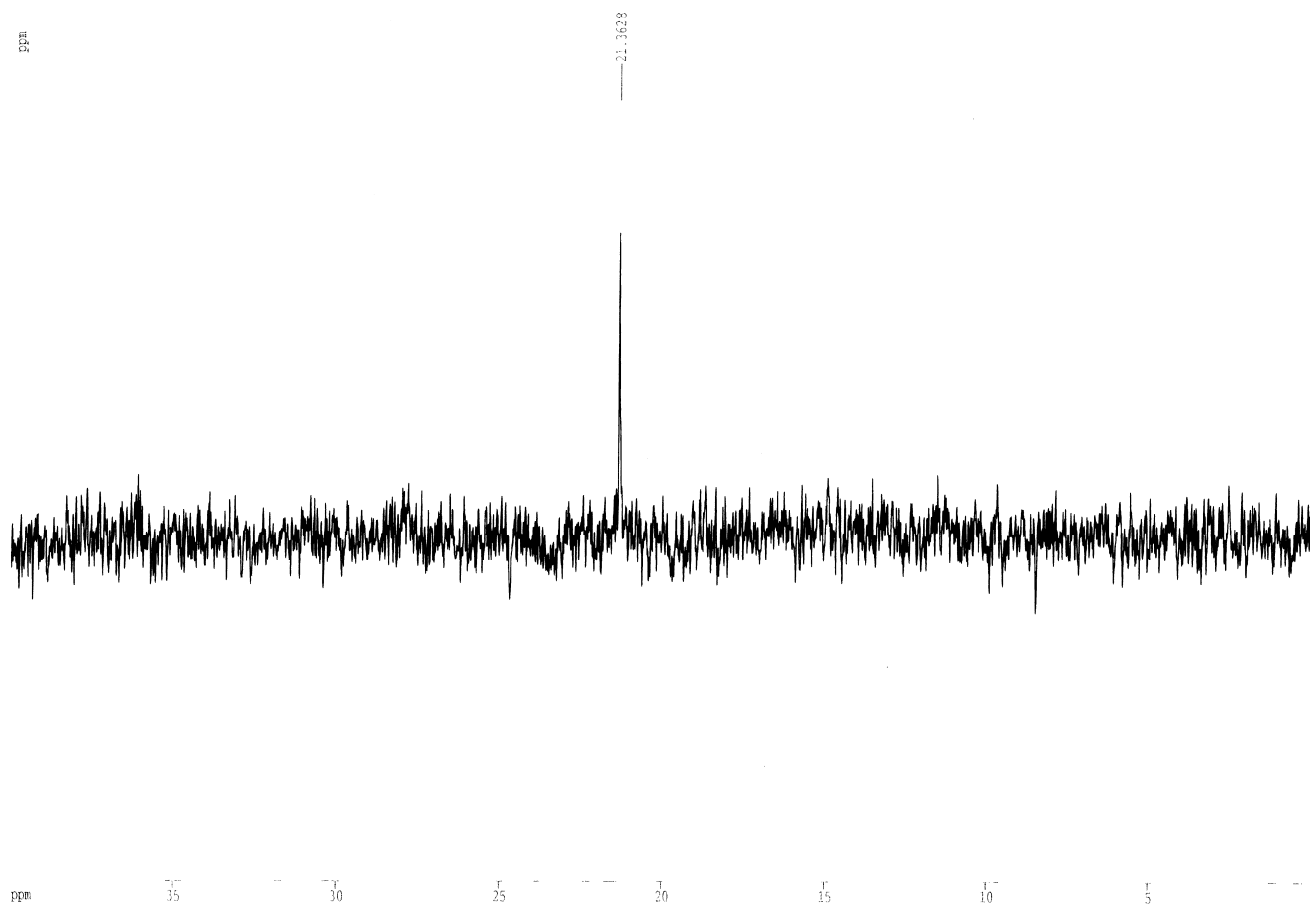

Current Data Parameters  
NAME satd  
EXPNO 111065  
PROCNO 1

F2 - Acquisition Parameters  
Date\_ 500000  
Time 17.11  
INSTRUM dpx300  
PROBHD 5 mm QNP 1H  
PULPROG zgpg30  
TD 65536  
SOLVENT C6D6  
NS 423  
DS 2  
SWH 11904.762 Hz  
FIDRES 0.181652 Hz  
AQ 2.7525620 sec  
RG 256  
DW 42.000 usec  
DE 4.50 usec  
TE 300.0 K  
D11 0.03000000 sec  
PL12 16.00 dB  
D1 10.00000000 sec  
P1 6.70 usec  
DE 4.50 usec  
SFO1 59.6243916 MHz  
NUC1 29Si  
PL1 -6.00 dB  
CPDPRG2 waltz16  
PCPD2 100.00 usec  
SFO2 300.1312005 MHz  
NUC2 1H  
PL2 -6.00 dB

F2 - Processing parameters  
SI 32768  
SF 59.6273730 MHz  
WDW EM  
SSB 0  
LB 1.00 Hz  
GB 0  
PC 1.40

1D NMR plot parameters  
CX 32.00 cm  
F1P 40.000 ppm  
F1 2385.09 Hz  
F2P 0.000 ppm  
F2 0.00 Hz  
PPMCM 1.25000 ppm/cm  
HZCM 74.53422 Hz/cm

Figure 25S.  $^{29}\text{Si}$  NMR spectra of p-2 in  $\text{CDCl}_3$ .

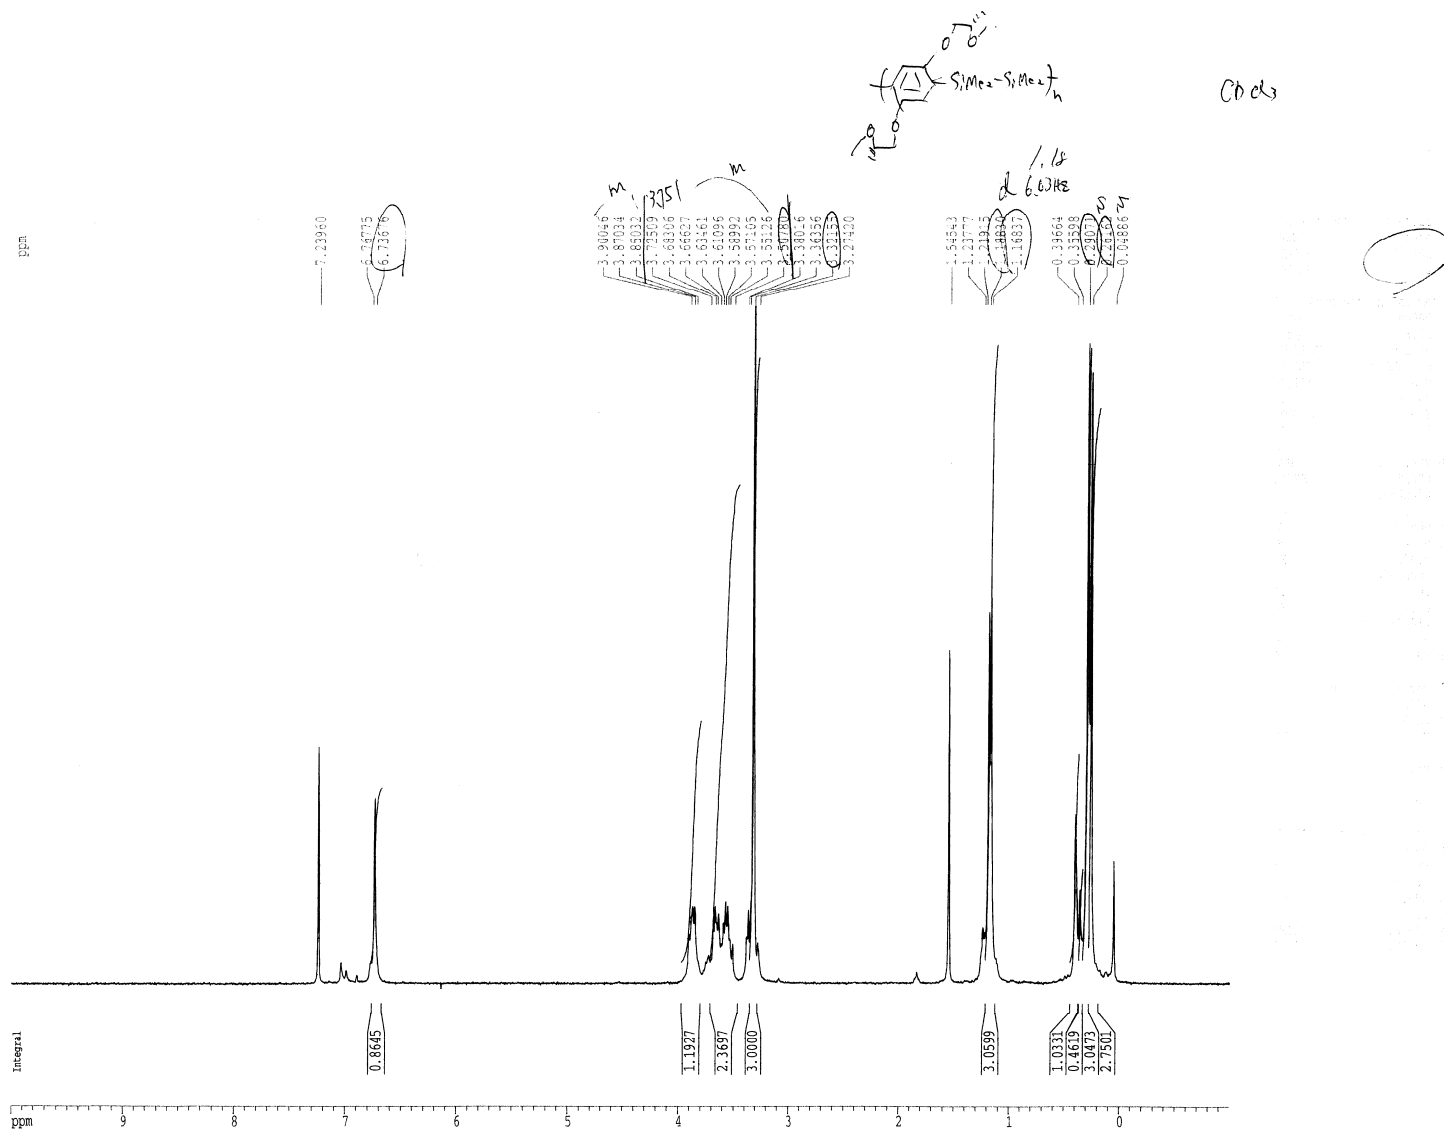

Figure 26S. <sup>1</sup>H NMR spectra of p-2 in CDCl<sub>3</sub>.

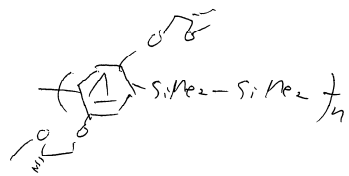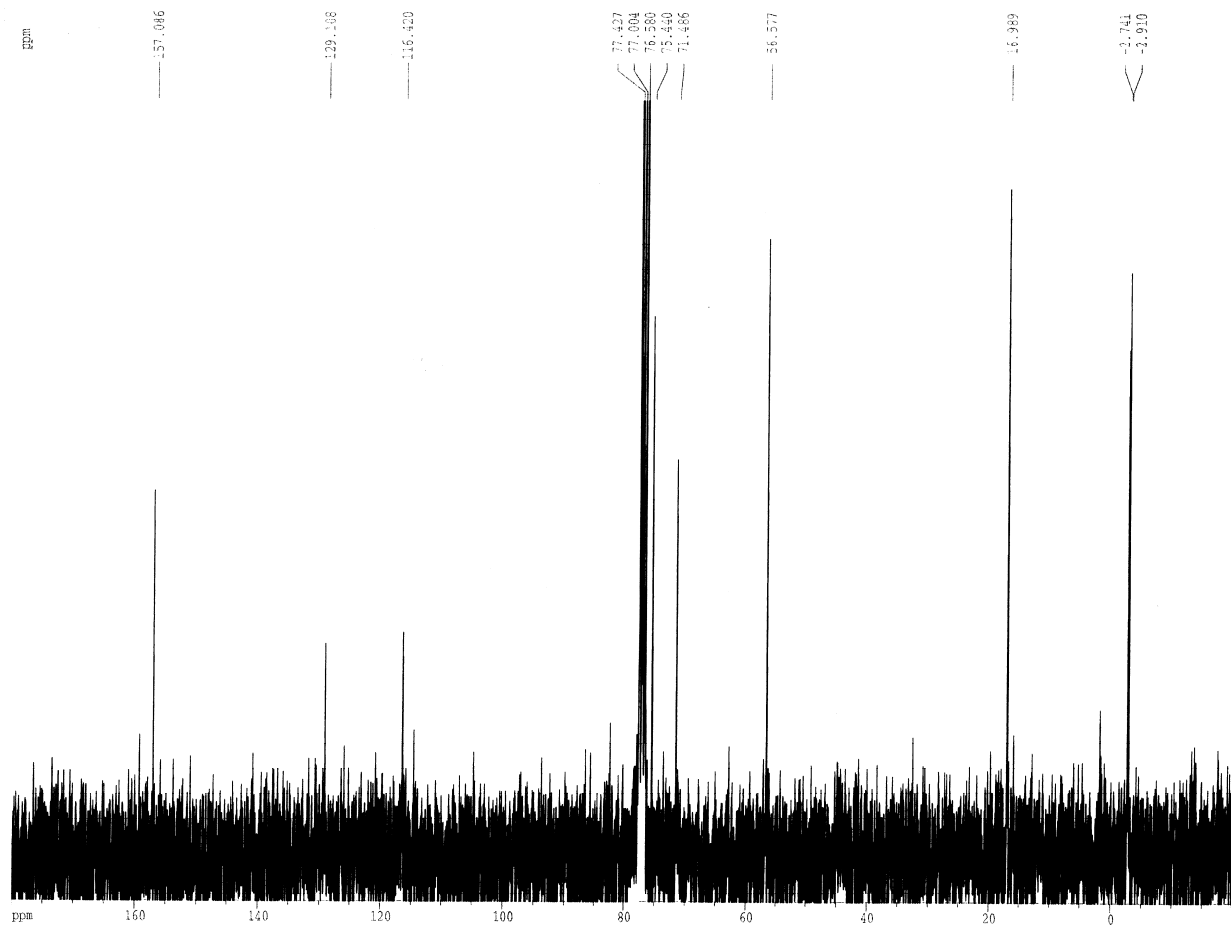

Current Data Parameters  
NAME Sato  
EXPNO 711143  
PROCNO 1

F2 - Acquisition Parameters  
Date\_ 500000  
Time 14.02  
INSTRUM dpx300  
PROBHD 5 mm QNP 1H  
PULPROG zgpg30  
TD 65536  
SOLVENT CDCl3  
NS 1024  
DS 2  
SWH 23809.523 Hz  
FIDRES 0.363304 Hz  
AQ 1.3763061 sec  
RG 8192  
DW 21.000 usec  
DE 4.50 usec  
TE 300.0 K  
D12 0.00002000 sec  
PL13 16.00 dB  
D1 1.00000000 sec  
CPDPRG2 waltz16  
PCPD2 100.00 usec  
SFO2 300.1312005 MHz  
NUC2 1H  
PL2 -6.00 dB  
PL12 16.00 dB  
PI 5.70 usec  
DE 4.50 usec  
SFO1 75.4772501 MHz  
NUC1 13C  
PL1 -6.00 dB  
D11 0.03000000 sec

F2 - Processing parameters  
SI 32768  
SF 75.4677501 MHz  
WDW EM  
SSB 0  
LB 1.00 Hz  
GB 0  
PC 1.40

1D NMR plot parameters  
CX 30.00 cm  
FIP 180.000 ppm  
F1 13584.20 Hz  
F2P -20.000 ppm  
F2 -1509.35 Hz  
PPMCM 6.66667 ppm/cm  
HZCM 503.11829 Hz/cm

Figure 27S. <sup>13</sup>C NMR spectra of p-1 in CDCl<sub>3</sub>.

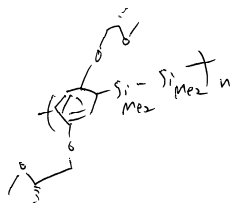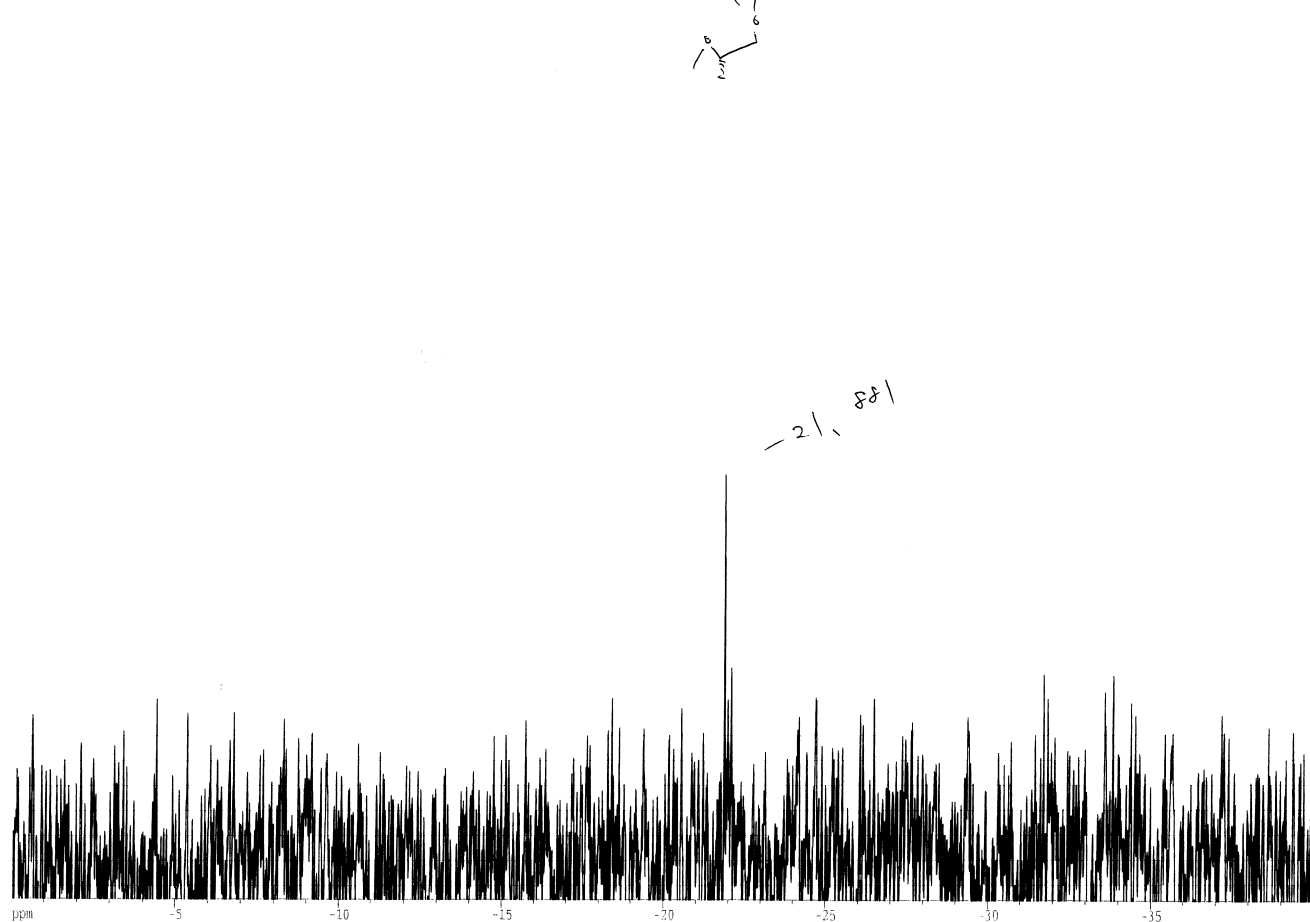

Current Data Parameters  
NAME sato  
EXPNO 711124  
PROCNO 1

F2 - Acquisition Parameters  
Date\_ 500000  
Time 8.30  
INSTRUM dpx300  
PROBHD 5 mm QNP 1H  
PULPROG zgpg30  
TD 65536  
SOLVENT C6D6  
NS 2757  
DS 2  
SWH 11904.762 Hz  
FIDRES 0.181652 Hz  
AQ 2.7525620 sec  
RG 362  
DW 42.000 usec  
DE 4.50 usec  
TE 300.0 K  
D11 0.03000000 sec  
PL12 16.00 dB  
D1 10.00000000 sec  
P1 6.70 usec  
DE 4.50 usec  
SF01 59.6243916 MHz  
NUC1 29Si  
PL1 -6.00 dB  
CPDPRG2 waltz16  
PCPD2 100.00 usec  
SF02 300.1312005 MHz  
NUC2 1H  
PL2 -6.00 dB

F2 - Processing parameters  
SI 32768  
SF 59.6273730 MHz  
WDW EM  
SSB 0  
LB 1.00 Hz  
GB 0  
PC 1.40

1D NMR plot parameters  
CX 32.00 cm  
F1P 0.000 ppm  
F1 0.00 Hz  
F2P -40.000 ppm  
F2 -2385.09 Hz  
PPMCM 1.25000 ppm/cm  
HZCM 74.53422 Hz/cm

Figure 28S. <sup>29</sup>Si NMR spectra of p-2 in CDCl<sub>3</sub>.
